# Supplementary material for: Climate and seasonality drive the richness and composition of tropical fungal endophytes at a landscape scale
Source: Commun Biol. 2021 Mar 9;4:313. doi: 10.1038/s42003-021-01826-7 (PMC7943826; doi:10.1038/s42003-021-01826-7)
Supplement: Supplementary file 3 — Supplementary Data 1 [file 42003_2021_1826_MOESM3_ESM.xlsx]

## Sheet: Data S1
Supplementary Data 1. Vegetation characteristics of each plot surveyed for endophytic fungi in western Panama.
Stem density is the total number of living stems with > 1cm diameter at breast height (DBH).
Stem richness was categorical and based on morphology: 1, <2 species; 2, 2-3 species; 3, 4-5 species; and 4, > 5 species greater than 1 cm DBH on the 4 x 5 m plot.
Canopy cover was measured with a densiometer at nine points on each plot (four corners and four middle points on each edge, and the center of the plot).
Aspect was evaluated with a compass toward the direction that a slope faced. It varied from 0 (no rise) through 180 (the slope facing south) to 360 (north).
Site	Plot code	Collection date	Protected area	Vegetation type	Habitat	Stem density (count)	Stem richness class	Rise (cm/m)	Aspect (°)	Canopy cover (X/9)	Largest plant DBH (cm)	Forest status
Parida	Parida 1	2016-06-29	Parque Nacional Golfo de Chiriquí	Isthmian-Pacific moist forests	Lowland semideciduous forest	7	4	2	340	8	12.4	Primary, undisturbed
Parida	Parida 2	2016-06-29	Parque Nacional Golfo de Chiriquí	Isthmian-Pacific moist forests	Lowland semideciduous forest	10	4	3	220	8	5	Primary, undisturbed
Fortuna	Fortuna 1	2016-07-05	Reserva Forestal Fortuna	Talamancan montane forests	Montane mixed forest	9	4	20	150	7	15.6	Primary, undisturbed
Fortuna	Fortuna 2	2016-07-05	Reserva Forestal Fortuna	Talamancan montane forests	Montane mixed forest	4	4	13	28	9	17.5	Primary, undisturbed
Copete	Copete 1	2016-07-04	Parque Nacional Volcán Barú	Talamancan montane forests	Montane Quercus forest	11	2	10	135	6	15.9	Primary, undisturbed
Copete	Copete 2	2016-07-04	Parque Nacional Volcán Barú	Talamancan montane forests	Montane Quercus forest	5	1	0	0	6	24.2	Primary, undisturbed
Baru	Baru 1	2016-06-30	Parque Nacional Volcán Barú	Talamancan montane forests	Montane scrub-forest	11	2	75	250	6	16.6	Primary, undisturbed
Baru	Baru 2	2016-06-30	Parque Nacional Volcán Barú	Talamancan montane forests	Montane scrub-forest	9	2	54	250	3	15	Primary, undisturbed
Price	Price 1	2016-07-04	Parque Nacional Volcán Barú	Talamancan montane forests	Montane Quercus forest	9	3	42	70	5	5.4	Primary, undisturbed
Price	Price 2	2016-07-04	Parque Nacional Volcán Barú	Talamancan montane forests	Montane Quercus forest	5	3	46	70	7	9.2	Primary, undisturbed
Bastimentos	Bastimentos 1	2016-07-06	Parque Nacional Isla Bastimentos	Isthmian-Atlantic moist forests	Lowland evergreen forest	12	3	0	0	8	10.8	Primary, undisturbed
Bastimentos	Bastimentos 2	2016-07-06	Parque Nacional Isla Bastimentos	Isthmian-Atlantic moist forests	Lowland evergreen forest	7	3	0	0	6	30.6	Primary, undisturbed
