# Supplementary material for: Climate and seasonality drive the richness and composition of tropical fungal endophytes at a landscape scale
Source: Commun Biol. 2021 Mar 9;4:313. doi: 10.1038/s42003-021-01826-7 (PMC7943826; doi:10.1038/s42003-021-01826-7)
Supplement: Supplementary file 5 — Supplementary Data 3 [file 42003_2021_1826_MOESM5_ESM.xlsx]

## Sheet: Data S3
Supplementary Data 3. Assigned class and genus of each endophyte OTU with the SINTAX algorithm based on the UNITE database (version 7.2) with an inferred confidence level.
Operational taxonomic units (OTUs) were assigned at 95% sequence similarity of ITS1 region.
We used a cutoff of 0.8 for class identification for the taxonomy abundance analysis. The assigned class or genus with lower than 0.8 in a confidence level (shown here as N/A) was included as "Other Ascomycota".
We did not use shallow taxonomic levels (i.e., species) in our analyses due to short length of MiSeq sequences.
OTU	Class	Genus
Otu100	Sordariomycetes (0.99)	Microascales (0.81)
Otu1000	Sordariomycetes (0.94)	N/A
Otu1002	Orbiliomycetes (1.00)	Orbiliales (1.00)
Otu1003	Sordariomycetes (0.99)	N/A
Otu1004	Sordariomycetes (1.00)	Diaporthales (1.00)
Otu1006	Dothideomycetes (0.81)	N/A
Otu1007	Sordariomycetes (1.00)	Hypocreales (1.00)
Otu1008	Sordariomycetes (0.86)	N/A
Otu1009	Sordariomycetes (0.87)	N/A
Otu1010	Sordariomycetes (0.96)	N/A
Otu1011	Sordariomycetes (0.94)	N/A
Otu1015	Dothideomycetes (0.94)	Capnodiales (0.93)
Otu1017	N/A	N/A
Otu1018	N/A	N/A
Otu1019	Sordariomycetes (0.83)	N/A
Otu102	Sordariomycetes (1.00)	N/A
Otu1020	Sordariomycetes (0.99)	Microascales (0.93)
Otu1023	Leotiomycetes (0.96)	Helotiales (0.96)
Otu1025	Sordariomycetes (0.99)	Xylariales (0.99)
Otu1027	N/A	N/A
Otu1029	Eurotiomycetes (0.81)	Chaetothyriales (0.81)
Otu103	N/A	N/A
Otu1031	Sordariomycetes (0.89)	Xylariales (0.8)
Otu1032	Sordariomycetes (0.93)	N/A
Otu1033	Sordariomycetes (0.96)	N/A
Otu1035	N/A	N/A
Otu1036	Eurotiomycetes (0.8)	Chaetothyriales (0.8)
Otu1037	Sordariomycetes (0.92)	N/A
Otu1038	Dothideomycetes (0.98)	Pleosporales (0.98)
Otu1039	Sordariomycetes (0.94)	N/A
Otu104	Orbiliomycetes (1.00)	Orbiliales (1.00)
Otu1041	Dothideomycetes (0.99)	Capnodiales (0.99)
Otu1043	Sordariomycetes (0.99)	Microascales (0.87)
Otu1044	N/A	N/A
Otu1045	N/A	N/A
Otu1046	Leotiomycetes (0.89)	Helotiales (0.88)
Otu1049	Sordariomycetes (0.98)	Hypocreales (0.98)
Otu105	Sordariomycetes (0.98)	Microascales (0.86)
Otu1050	Sordariomycetes (0.97)	Microascales (0.95)
Otu1051	Sordariomycetes (0.98)	N/A
Otu1052	N/A	N/A
Otu1053	N/A	N/A
Otu1055	Sordariomycetes (0.92)	N/A
Otu1056	Sordariomycetes (0.95)	Sordariales (0.85)
Otu1057	Dothideomycetes (1.00)	Botryosphaeriales (0.98)
Otu1058	Sordariomycetes (0.93)	Diaporthales (0.89)
Otu1059	N/A	N/A
Otu106	Sordariomycetes (1.00)	Xylariales (1.00)
Otu1065	N/A	N/A
Otu1066	Sordariomycetes (0.92)	N/A
Otu1067	N/A	N/A
Otu1068	Sordariomycetes (0.94)	N/A
Otu1069	Sordariomycetes (1.00)	Xylariales (1.00)
Otu107	Eurotiomycetes (0.95)	Chaetothyriales (0.95)
Otu1070	Dothideomycetes (0.99)	Pleosporales (0.99)
Otu1071	Sordariomycetes (1.00)	Xylariales (1.00)
Otu1072	Eurotiomycetes (0.83)	N/A
Otu1073	N/A	N/A
Otu1074	Sordariomycetes (0.97)	Xylariales (0.81)
Otu1076	N/A	N/A
Otu1077	Sordariomycetes (0.85)	N/A
Otu108	Sordariomycetes (1.00)	Xylariales (1.00)
Otu1080	Sordariomycetes (1.00)	N/A
Otu1082	N/A	N/A
Otu1083	Sordariomycetes (0.98)	Microascales (0.97)
Otu1085	N/A	N/A
Otu1087	N/A	N/A
Otu1088	Dothideomycetes (0.86)	N/A
Otu1091	Sordariomycetes (1.00)	Sordariales (1.00)
Otu1092	Sordariomycetes (0.95)	N/A
Otu1094	Sordariomycetes (0.82)	N/A
Otu1096	Sordariomycetes (0.85)	N/A
Otu1097	Sordariomycetes (0.96)	N/A
Otu1099	Sordariomycetes (0.8)	N/A
Otu11	Sordariomycetes (0.99)	Diaporthales (0.99)
Otu110	N/A	N/A
Otu1100	Leotiomycetes (0.94)	Helotiales (0.94)
Otu1101	Sordariomycetes (1.00)	Xylariales (1.00)
Otu1103	N/A	N/A
Otu1106	Sordariomycetes (0.94)	N/A
Otu1108	Sordariomycetes (1.00)	Chaetosphaeriales (1.00)
Otu1110	Sordariomycetes (0.96)	N/A
Otu1112	Sordariomycetes (0.88)	N/A
Otu1114	Sordariomycetes (0.89)	Xylariales (0.88)
Otu1117	Sordariomycetes (0.93)	Xylariales (0.92)
Otu1118	Sordariomycetes (0.94)	Xylariales (0.88)
Otu1119	Sordariomycetes (0.81)	Hypocreales (0.81)
Otu112	Eurotiomycetes (1.00)	Chaetothyriales (1.00)
Otu1123	N/A	N/A
Otu1125	Eurotiomycetes (0.97)	Chaetothyriales (0.96)
Otu1126	Sordariomycetes (0.84)	N/A
Otu1127	Dothideomycetes (0.97)	Venturiales (0.97)
Otu1128	N/A	N/A
Otu1129	Leotiomycetes (1.00)	Helotiales (1.00)
Otu1130	N/A	N/A
Otu1131	Sordariomycetes (0.83)	N/A
Otu1133	Sordariomycetes (0.86)	N/A
Otu1134	N/A	N/A
Otu1135	Dothideomycetes (1.00)	Capnodiales (0.81)
Otu1138	Sordariomycetes (0.91)	N/A
Otu1139	Sordariomycetes (1.00)	Xylariales (1.00)
Otu114	N/A	N/A
Otu1140	N/A	N/A
Otu1142	Sordariomycetes (1.00)	Hypocreales (1.00)
Otu1143	Saccharomycetes (1.00)	Saccharomycetales (1.00)
Otu1144	N/A	N/A
Otu1147	N/A	N/A
Otu115	Sordariomycetes (0.98)	N/A
Otu1152	Dothideomycetes (0.92)	N/A
Otu1153	Sordariomycetes (0.93)	Xylariales (0.81)
Otu1154	Sordariomycetes (1.00)	Hypocreales (1.00)
Otu1155	Dothideomycetes (0.98)	Capnodiales (0.98)
Otu1156	Sordariomycetes (0.88)	N/A
Otu1157	Dothideomycetes (1.00)	Venturiales (1.00)
Otu1158	Dothideomycetes (0.98)	Capnodiales (0.98)
Otu116	Dothideomycetes (0.98)	Capnodiales (0.98)
Otu1160	Leotiomycetes (0.92)	N/A
Otu1162	N/A	N/A
Otu1163	Sordariomycetes (0.99)	Xylariales (0.98)
Otu1164	Dothideomycetes (0.93)	Capnodiales (0.93)
Otu1165	Dothideomycetes (0.85)	Pleosporales (0.85)
Otu1166	N/A	N/A
Otu1169	Dothideomycetes (0.91)	Capnodiales (0.91)
Otu117	Dothideomycetes (0.98)	Capnodiales (0.98)
Otu1171	Dothideomycetes (0.81)	N/A
Otu1172	Sordariomycetes (0.82)	N/A
Otu1174	N/A	N/A
Otu1175	Dothideomycetes (0.86)	N/A
Otu1176	Eurotiomycetes (0.81)	N/A
Otu1177	N/A	N/A
Otu1179	N/A	N/A
Otu1183	Sordariomycetes (0.82)	N/A
Otu1184	Dothideomycetes (1.00)	Botryosphaeriales (1.00)
Otu1185	Sordariomycetes (0.81)	N/A
Otu1186	Sordariomycetes (1.00)	Glomerellales (0.93)
Otu1187	Dothideomycetes (1.00)	Venturiales (1.00)
Otu1189	N/A	N/A
Otu119	Sordariomycetes (0.93)	N/A
Otu1190	Eurotiomycetes (0.88)	Chaetothyriales (0.86)
Otu1191	Leotiomycetes (1.00)	Erysiphales (0.99)
Otu1192	Sordariomycetes (0.9)	N/A
Otu1193	Sordariomycetes (0.99)	Chaetosphaeriales (0.98)
Otu1194	N/A	N/A
Otu1198	Dothideomycetes (1.00)	Pleosporales (1.00)
Otu12	N/A	N/A
Otu1200	Sordariomycetes (1.00)	Sordariales (1.00)
Otu1201	N/A	N/A
Otu1206	Sordariomycetes (0.9)	N/A
Otu1207	Leotiomycetes (0.91)	Helotiales (0.91)
Otu1208	Sordariomycetes (0.99)	Microascales (0.87)
Otu1209	Dothideomycetes (0.98)	Capnodiales (0.98)
Otu1210	Sordariomycetes (0.98)	N/A
Otu1212	Sordariomycetes (1.00)	Hypoceales (1.00)
Otu1213	Leotiomycetes (1.00)	Helotiales (1.00)
Otu1214	Sordariomycetes (0.98)	Xylariales (0.98)
Otu1215	Sordariomycetes (0.98)	Xylariales (0.97)
Otu1219	Sordariomycetes (0.99)	N/A
Otu1220	Sordariomycetes (1.00)	Hypocreales (1.00)
Otu1221	Dothideomycetes (0.98)	Myriangiales (0.98)
Otu1225	Sordariomycetes (0.94)	N/A
Otu1227	Sordariomycetes (1.00)	Chaetosphaeriales (1.00)
Otu1228	Eurotiomycetes (0.91)	Chaetothyriales (0.91)
Otu1229	N/A	N/A
Otu123	Sordariomycetes (0.95)	N/A
Otu1231	Dothideomycetes (0.97)	Capnodiales (0.97)
Otu1232	Sordariomycetes (0.92)	Xylariales (0.85)
Otu1233	Eurotiomycetes (1.00)	Chaetothyriales (1.00)
Otu1235	Sordariomycetes (1.00)	Xylariales (1.00)
Otu1238	Sordariomycetes (0.99)	Xylariales (0.99)
Otu1239	Eurotiomycetes (0.99)	Phaeomoniellales (0.95)
Otu124	Dothideomycetes (0.99)	Pleosporales (0.99)
Otu1242	Sordariomycetes (1.00)	Microascales (0.98)
Otu1243	Dothideomycetes (1.00)	Capnodiales (1.00)
Otu1244	Sordariomycetes (0.93)	N/A
Otu1245	Sordariomycetes (1.00)	Hypocreales (0.99)
Otu1248	Sordariomycetes (0.97)	Hypocreales (0.97)
Otu1249	Dothideomycetes (0.89)	Pleosporales (0.88)
Otu1250	Sordariomycetes (1.00)	Chaetosphaeriales (0.98)
Otu1251	Dothideomycetes (0.97)	Botryosphaeriales (0.97)
Otu1252	Sordariomycetes (1.00)	N/A
Otu1253	Dothideomycetes (0.95)	Capnodiales (0.95)
Otu1254	Leotiomycetes (0.99)	N/A
Otu1256	Dothideomycetes (0.91)	Capnodiales (0.88)
Otu1257	Dothideomycetes (0.86)	Capnodiales (0.86)
Otu1258	Leotiomycetes (0.99)	Helotiales (0.99)
Otu1259	Sordariomycetes (1.00)	Xylariales (1.00)
Otu1260	Dothideomycetes (1.00)	Pleosporales (1.00)
Otu1261	Leotiomycetes (0.94)	Helotiales (0.94)
Otu1263	Leotiomycetes (0.91)	Helotiales (0.87)
Otu1266	Sordariomycetes (0.97)	N/A
Otu1267	Sordariomycetes (1.00)	N/A
Otu1268	Dothideomycetes (0.89)	N/A
Otu127	Sordariomycetes (0.99)	Xylariales (0.83)
Otu1270	Sordariomycetes (0.99)	Glomerellales (0.86)
Otu1271	N/A	N/A
Otu1276	Sordariomycetes (1.00)	N/A
Otu128	Sordariomycetes (0.95)	Xylariales (0.91)
Otu1283	Sordariomycetes (1.00)	Diaporthales (1.00)
Otu1284	Dothideomycetes (0.91)	Capnodiales (0.91)
Otu1285	Leotiomycetes (0.96)	Helotiales (0.96)
Otu1287	Sordariomycetes (0.98)	Xylariales (0.97)
Otu1288	N/A	N/A
Otu1289	Sordariomycetes (0.94)	Xylariales (0.88)
Otu1290	Sordariomycetes (0.98)	Xylariales (0.91)
Otu1291	N/A	N/A
Otu1292	N/A	N/A
Otu1293	N/A	N/A
Otu1294	Sordariomycetes (0.99)	Sordariales (0.94)
Otu1295	Dothideomycetes (0.85)	N/A
Otu1296	Dothideomycetes (1.00)	Capnodiales (1.00)
Otu1298	Dothideomycetes (0.91)	Capnodiales (0.88)
Otu130	Dothideomycetes (1.00)	Capnodiales (1.00)
Otu1300	Sordariomycetes (1.00)	Hypocreales (1.00)
Otu1306	Saccharomycetes (0.99)	Saccharomycetales (0.99)
Otu1308	Sordariomycetes (1.00)	Xylariales (0.99)
Otu1309	Dothideomycetes (0.99)	Capnodiales (0.99)
Otu1310	Leotiomycetes (0.8)	Helotiales (0.8)
Otu1311	Leotiomycetes (0.96)	Helotiales (0.81)
Otu1312	Dothideomycetes (1.00)	N/A
Otu1313	N/A	N/A
Otu1314	Sordariomycetes (0.95)	N/A
Otu1315	Sordariomycetes (0.99)	N/A
Otu1317	Dothideomycetes (0.99)	Capnodiales (0.99)
Otu1318	Sordariomycetes (0.83)	Xylariales (0.82)
Otu1319	N/A	N/A
Otu132	Sordariomycetes (0.99)	Microascales (0.89)
Otu1320	Sordariomycetes (0.97)	Sordariales (0.97)
Otu1322	Sordariomycetes (0.91)	N/A
Otu1324	Sordariomycetes (0.84)	N/A
Otu1325	N/A	N/A
Otu1326	N/A	N/A
Otu1327	Sordariomycetes (0.83)	N/A
Otu1328	Sordariomycetes (0.86)	N/A
Otu133	N/A	N/A
Otu1331	Sordariomycetes (1.00)	Glomerellales (0.97)
Otu1332	Sordariomycetes (1.00)	N/A
Otu1333	N/A	N/A
Otu1334	N/A	N/A
Otu1335	Sordariomycetes (0.84)	Xylariales (0.84)
Otu1339	Leotiomycetes (0.84)	Helotiales (0.84)
Otu134	Sordariomycetes (0.84)	Xylariales (0.8)
Otu1343	N/A	N/A
Otu1344	Dothideomycetes (0.99)	Microthyriales (0.99)
Otu1345	N/A	N/A
Otu1346	Sordariomycetes (0.91)	Hypocreales (0.9)
Otu1348	Sordariomycetes (0.93)	Xylariales (0.87)
Otu1349	Sordariomycetes (0.83)	N/A
Otu135	Sordariomycetes (1.00)	N/A
Otu1351	Dothideomycetes (0.95)	Pleosporales (0.94)
Otu1352	Dothideomycetes (0.98)	N/A
Otu1353	Sordariomycetes (0.98)	Hypocreales (0.98)
Otu1354	Sordariomycetes (0.99)	N/A
Otu1355	Sordariomycetes (0.86)	N/A
Otu1356	Eurotiomycetes (0.86)	N/A
Otu1359	N/A	N/A
Otu136	Sordariomycetes (0.85)	N/A
Otu1360	N/A	N/A
Otu1364	Sordariomycetes (0.96)	N/A
Otu1365	Sordariomycetes (0.99)	N/A
Otu1370	N/A	N/A
Otu1371	N/A	N/A
Otu1374	Eurotiomycetes (1.00)	Chaetothyriales (1.00)
Otu1375	Sordariomycetes (0.9)	N/A
Otu1377	Sordariomycetes (0.96)	Xylariales (0.9)
Otu1378	Sordariomycetes (0.82)	N/A
Otu1379	Sordariomycetes (0.98)	Xylariales (0.98)
Otu138	Sordariomycetes (1.00)	Xylariales (1.00)
Otu1381	Sordariomycetes (0.9)	N/A
Otu1382	Sordariomycetes (0.97)	N/A
Otu1383	Eurotiomycetes (1.00)	Coryneliales (1.00)
Otu1384	Sordariomycetes (0.88)	N/A
Otu1388	Sordariomycetes (1.00)	Xylariales (1.00)
Otu1389	Sordariomycetes (0.9)	N/A
Otu139	Eurotiomycetes (0.95)	Chaetothyriales (0.95)
Otu1390	Sordariomycetes (0.97)	Xylariales (0.97)
Otu1391	Sordariomycetes (0.97)	Hypocreales (0.95)
Otu1392	N/A	N/A
Otu1393	Eurotiomycetes (1.00)	Chaetothyriales (1.00)
Otu1394	Eurotiomycetes (0.98)	Chaetothyriales (0.98)
Otu1399	Sordariomycetes (0.96)	Xylariales (0.85)
Otu1400	Sordariomycetes (0.94)	N/A
Otu1404	N/A	N/A
Otu1406	Leotiomycetes (0.88)	Helotiales (0.88)
Otu141	Sordariomycetes (1.00)	N/A
Otu1410	Sordariomycetes (1.00)	Microascales (1.00)
Otu1411	Sordariomycetes (0.82)	N/A
Otu1412	Sordariomycetes (0.85)	N/A
Otu1414	Sordariomycetes (1.00)	Glomerellales (1.00)
Otu142	Leotiomycetes (1.00)	Helotiales (1.00)
Otu1422	N/A	N/A
Otu1424	Sordariomycetes (0.98)	N/A
Otu1426	N/A	N/A
Otu1428	Dothideomycetes (1.00)	Pleosporales (1.00)
Otu1429	Eurotiomycetes (0.88)	Chaetothyriales (0.8)
Otu143	N/A	N/A
Otu1432	Sordariomycetes (0.97)	Xylariales (0.89)
Otu1433	N/A	N/A
Otu1434	Leotiomycetes (0.99)	Helotiales (0.98)
Otu1438	Dothideomycetes (0.84)	N/A
Otu1439	Eurotiomycetes (0.83)	Chaetothyriales (0.83)
Otu144	Sordariomycetes (0.99)	Hypocreales (0.99)
Otu1440	Sordariomycetes (0.97)	N/A
Otu1442	Sordariomycetes (0.99)	Hypocreales (0.98)
Otu1443	Leotiomycetes (0.98)	Helotiales (0.98)
Otu1446	Sordariomycetes (1.00)	Xylariales (1.00)
Otu1448	N/A	N/A
Otu1449	Sordariomycetes (0.89)	Xylariales (0.86)
Otu145	Sordariomycetes (1.00)	Sordariales (1.00)
Otu1450	N/A	N/A
Otu1451	Sordariomycetes (0.89)	Xylariales (0.88)
Otu1453	Dothideomycetes (0.98)	Capnodiales (0.98)
Otu1454	N/A	N/A
Otu1455	Eurotiomycetes (0.8)	Chaetothyriales (0.8)
Otu1458	N/A	N/A
Otu1459	Leotiomycetes (1.00)	Helotiales (1.00)
Otu146	Sordariomycetes (0.96)	N/A
Otu1461	N/A	N/A
Otu1462	Eurotiomycetes (0.92)	Chaetothyriales (0.85)
Otu1465	Leotiomycetes (0.84)	Helotiales (0.84)
Otu1467	Sordariomycetes (0.89)	Xylariales (0.88)
Otu1469	Sordariomycetes (1.00)	Hypocreales (1.00)
Otu147	Leotiomycetes (1.00)	Helotiales (1.00)
Otu1470	Sordariomycetes (1.00)	Glomerellales (1.00)
Otu1472	Sordariomycetes (0.91)	N/A
Otu1474	N/A	N/A
Otu1477	N/A	N/A
Otu1479	Sordariomycetes (0.89)	Hypocreales (0.87)
Otu148	Sordariomycetes (1.00)	Hypocreales (0.99)
Otu1480	Dothideomycetes (0.98)	Pleosporales (0.98)
Otu1481	Dothideomycetes (0.88)	Capnodiales (0.88)
Otu1483	Sordariomycetes (0.95)	Xylariales (0.86)
Otu1484	Sordariomycetes (1.00)	Xylariales (1.00)
Otu1489	Sordariomycetes (0.94)	N/A
Otu1493	Eurotiomycetes (0.93)	N/A
Otu1494	N/A	N/A
Otu1495	N/A	N/A
Otu1496	Sordariomycetes (0.99)	Hypocreales (0.99)
Otu1498	N/A	N/A
Otu1499	Sordariomycetes (0.96)	Xylariales (0.96)
Otu1501	Sordariomycetes (0.81)	N/A
Otu1502	Sordariomycetes (0.89)	N/A
Otu1504	Dothideomycetes (0.97)	Botryosphaeriales (0.97)
Otu1505	Sordariomycetes (0.98)	Microascales (0.96)
Otu1507	Sordariomycetes (0.89)	N/A
Otu1508	Sordariomycetes (0.8)	N/A
Otu151	N/A	N/A
Otu1511	Sordariomycetes (0.86)	N/A
Otu1513	Sordariomycetes (0.96)	N/A
Otu1517	Sordariomycetes (0.95)	N/A
Otu1519	Leotiomycetes (0.82)	Helotiales (0.82)
Otu152	Sordariomycetes (0.87)	N/A
Otu1520	Sordariomycetes (0.99)	N/A
Otu1521	N/A	N/A
Otu1522	Sordariomycetes (0.9)	Hypocreales (0.85)
Otu1523	Sordariomycetes (0.97)	N/A
Otu1526	Leotiomycetes (1.00)	Erysiphales (1.00)
Otu1528	Sordariomycetes (0.97)	Diaporthales (0.91)
Otu153	Sordariomycetes (0.99)	Diaporthales (0.99)
Otu1530	Orbiliomycetes (0.95)	Orbiliales (0.95)
Otu1533	Sordariomycetes (0.86)	N/A
Otu1535	Sordariomycetes (0.9)	N/A
Otu1537	Sordariomycetes (0.89)	N/A
Otu1538	Sordariomycetes (0.87)	Hypocreales (0.86)
Otu1539	Sordariomycetes (1.00)	N/A
Otu154	Sordariomycetes (1.00)	Sordariales (1.00)
Otu1540	Sordariomycetes (0.91)	N/A
Otu1542	N/A	N/A
Otu1544	N/A	N/A
Otu1546	N/A	N/A
Otu155	Sordariomycetes (1.00)	Xylariales (1.00)
Otu1552	N/A	N/A
Otu1556	N/A	N/A
Otu1557	Sordariomycetes (0.87)	Hypocreales (0.87)
Otu1559	Sordariomycetes (0.96)	N/A
Otu156	N/A	N/A
Otu1560	Eurotiomycetes (1.00)	Chaetothyriales (0.99)
Otu1561	Leotiomycetes (0.9)	Helotiales (0.9)
Otu1564	Dothideomycetes (0.98)	Myriangiales (0.98)
Otu1565	Sordariomycetes (0.98)	Xylariales (0.87)
Otu1566	N/A	N/A
Otu1567	Dothideomycetes (1.00)	Capnodiales (1.00)
Otu1568	Sordariomycetes (0.99)	N/A
Otu1569	Eurotiomycetes (0.89)	Chaetothyriales (0.88)
Otu157	Eurotiomycetes (0.94)	N/A
Otu1571	Eurotiomycetes (0.97)	Chaetothyriales (0.96)
Otu1572	Leotiomycetes (0.99)	Helotiales (0.99)
Otu1573	Sordariomycetes (0.99)	Xylariales (0.98)
Otu1574	N/A	N/A
Otu1577	N/A	N/A
Otu158	N/A	N/A
Otu1581	Eurotiomycetes (0.99)	Chaetothyriales (0.99)
Otu1586	N/A	N/A
Otu1587	Eurotiomycetes (0.8)	N/A
Otu159	Sordariomycetes (0.99)	N/A
Otu1590	Sordariomycetes (0.87)	N/A
Otu1591	Eurotiomycetes (0.92)	Chaetothyriales (0.92)
Otu1593	Sordariomycetes (0.9)	N/A
Otu1595	N/A	N/A
Otu1596	N/A	N/A
Otu1598	N/A	N/A
Otu1599	N/A	N/A
Otu16	Sordariomycetes (0.92)	N/A
Otu160	Sordariomycetes (0.91)	Xylariales (0.91)
Otu1603	N/A	N/A
Otu1604	N/A	N/A
Otu1605	Sordariomycetes (1.00)	Xylariales (1.00)
Otu1606	N/A	N/A
Otu1608	N/A	N/A
Otu1609	Eurotiomycetes (0.82)	N/A
Otu1612	N/A	N/A
Otu1613	Dothideomycetes (1.00)	Capnodiales (1.00)
Otu1615	Sordariomycetes (1.00)	Xylariales (1.00)
Otu1616	N/A	N/A
Otu1618	Sordariomycetes (0.86)	N/A
Otu1619	N/A	N/A
Otu1620	Eurotiomycetes (0.89)	N/A
Otu1625	Lecanoromycetes (0.93)	Peltigerales (0.88)
Otu1626	Sordariomycetes (0.8)	N/A
Otu1628	N/A	N/A
Otu163	Sordariomycetes (0.98)	Xylariales (0.89)
Otu1630	N/A	N/A
Otu1631	Sordariomycetes (0.9)	N/A
Otu1636	Sordariomycetes (0.9)	N/A
Otu1638	Sordariomycetes (0.9)	Xylariales (0.81)
Otu1639	Dothideomycetes (0.92)	N/A
Otu1640	Sordariomycetes (0.98)	N/A
Otu1642	Sordariomycetes (1.00)	Xylariales (1.00)
Otu1643	Pezizomycetes (1.00)	Pezizales (1.00)
Otu1645	Sordariomycetes (0.82)	N/A
Otu1647	Dothideomycetes (1.00)	Pleosporales (1.00)
Otu1648	Sordariomycetes (0.98)	N/A
Otu165	Sordariomycetes (1.00)	Xylariales (1.00)
Otu1656	N/A	N/A
Otu1658	Dothideomycetes (0.87)	Pleosporales (0.87)
Otu1659	Sordariomycetes (1.00)	Xylariales (1.00)
Otu166	Dothideomycetes (0.85)	Pleosporales (0.84)
Otu1660	Sordariomycetes (0.9)	N/A
Otu1664	Sordariomycetes (0.96)	N/A
Otu1668	Leotiomycetes (1.00)	Helotiales (1.00)
Otu1669	Sordariomycetes (0.87)	N/A
Otu1674	Sordariomycetes (0.98)	N/A
Otu1677	N/A	N/A
Otu1679	Lecanoromycetes (0.91)	Peltigerales (0.86)
Otu168	Sordariomycetes (0.88)	N/A
Otu1680	Sordariomycetes (0.99)	N/A
Otu1683	Eurotiomycetes (0.88)	Eurotiales (0.88)
Otu1687	N/A	N/A
Otu169	Sordariomycetes (0.89)	N/A
Otu1690	Sordariomycetes (0.81)	N/A
Otu1692	Sordariomycetes (0.99)	N/A
Otu1699	N/A	N/A
Otu17	N/A	N/A
Otu1703	Sordariomycetes (1.00)	Hypocreales (1.00)
Otu1704	Saccharomycetes (1.00)	Saccharomycetales (1.00)
Otu1706	Sordariomycetes (1.00)	Xylariales (0.95)
Otu1708	N/A	N/A
Otu1710	Leotiomycetes (0.9)	Helotiales (0.89)
Otu1716	Sordariomycetes (0.84)	N/A
Otu172	Sordariomycetes (0.94)	N/A
Otu1722	Sordariomycetes (0.97)	N/A
Otu1723	Eurotiomycetes (0.95)	Chaetothyriales (0.95)
Otu1724	Sordariomycetes (0.97)	Hypocreales (0.86)
Otu1725	Sordariomycetes (0.82)	N/A
Otu1726	Sordariomycetes (1.00)	Xylariales (1.00)
Otu173	N/A	N/A
Otu1730	N/A	N/A
Otu1732	N/A	N/A
Otu1737	N/A	N/A
Otu1738	Dothideomycetes (0.85)	N/A
Otu1739	N/A	N/A
Otu174	Leotiomycetes (0.98)	N/A
Otu1741	Sordariomycetes (1.00)	Glomerellales (1.00)
Otu1742	Sordariomycetes (0.99)	N/A
Otu1743	N/A	N/A
Otu1744	Sordariomycetes (0.84)	N/A
Otu1747	Sordariomycetes (0.98)	N/A
Otu175	Eurotiomycetes (0.82)	Chaetothyriales (0.82)
Otu1754	N/A	N/A
Otu1756	Sordariomycetes (1.00)	Xylariales (1.00)
Otu1757	Leotiomycetes (0.99)	Helotiales (0.99)
Otu1758	N/A	N/A
Otu1761	Dothideomycetes (0.94)	Hysteriales (0.86)
Otu1764	Dothideomycetes (0.82)	N/A
Otu1766	N/A	N/A
Otu1768	Sordariomycetes (1.00)	Hypocreales (1.00)
Otu177	Sordariomycetes (0.84)	Hypocreales (0.84)
Otu1770	Sordariomycetes (0.98)	Hypocreales (0.98)
Otu1772	Dothideomycetes (0.99)	Capnodiales (0.99)
Otu1773	Leotiomycetes (1.00)	Helotiales (1.00)
Otu1774	Sordariomycetes (0.98)	N/A
Otu1776	Eurotiomycetes (0.93)	Chaetothyriales (0.9)
Otu1777	Sordariomycetes (0.82)	N/A
Otu1778	Sordariomycetes (1.00)	Microascales (0.85)
Otu178	Sordariomycetes (0.93)	Xylariales (0.93)
Otu1781	N/A	N/A
Otu1782	Sordariomycetes (0.85)	N/A
Otu1783	Dothideomycetes (0.91)	Capnodiales (0.91)
Otu1784	Sordariomycetes (1.00)	Xylariales (1.00)
Otu1785	Dothideomycetes (1.00)	Pleosporales (1.00)
Otu1787	Leotiomycetes (0.96)	Helotiales (0.84)
Otu1788	Sordariomycetes (0.97)	Microascales (0.86)
Otu1789	Dothideomycetes (0.98)	Myriangiales (0.98)
Otu179	Sordariomycetes (1.00)	Xylariales (1.00)
Otu1791	Eurotiomycetes (0.99)	Chaetothyriales (0.99)
Otu1792	Dothideomycetes (1.00)	Capnodiales (1.00)
Otu1794	N/A	N/A
Otu1796	Sordariomycetes (0.98)	Chaetosphaeriales (0.82)
Otu1797	N/A	N/A
Otu1799	Eurotiomycetes (0.91)	Chaetothyriales (0.85)
Otu18	Sordariomycetes (0.86)	N/A
Otu1802	Sordariomycetes (1.00)	Xylariales (1.00)
Otu1804	N/A	N/A
Otu1805	Sordariomycetes (0.85)	N/A
Otu1808	N/A	N/A
Otu1809	Sordariomycetes (0.81)	N/A
Otu181	Sordariomycetes (0.99)	Hypocreales (0.99)
Otu1811	Sordariomycetes (0.98)	Xylariales (0.98)
Otu1812	Sordariomycetes (1.00)	Xylariales (1.00)
Otu1813	Dothideomycetes (1.00)	Pleosporales (0.8)
Otu1814	Orbiliomycetes (0.8)	N/A
Otu1818	N/A	N/A
Otu1822	Sordariomycetes (0.88)	N/A
Otu1824	Sordariomycetes (0.83)	N/A
Otu1825	Sordariomycetes (1.00)	N/A
Otu1827	Dothideomycetes (0.87)	Myriangiales (0.87)
Otu1828	Sordariomycetes (0.82)	N/A
Otu1829	Dothideomycetes (0.91)	Pleosporales (0.89)
Otu183	Sordariomycetes (0.93)	Xylariales (0.91)
Otu1831	Dothideomycetes (0.93)	Pleosporales (0.93)
Otu1832	Sordariomycetes (0.8)	N/A
Otu1833	Sordariomycetes (0.87)	N/A
Otu1834	N/A	N/A
Otu1836	Sordariomycetes (0.88)	N/A
Otu1839	Leotiomycetes (0.9)	Helotiales (0.9)
Otu184	Eurotiomycetes (0.96)	Chaetothyriales (0.96)
Otu1841	Leotiomycetes (0.91)	Helotiales (0.91)
Otu1842	N/A	N/A
Otu1844	Sordariomycetes (0.95)	N/A
Otu1845	Leotiomycetes (0.85)	Helotiales (0.84)
Otu1846	N/A	N/A
Otu1847	Eurotiomycetes (0.99)	Chaetothyriales (0.99)
Otu1850	Eurotiomycetes (0.9)	N/A
Otu1851	N/A	N/A
Otu1852	Sordariomycetes (0.92)	N/A
Otu1855	N/A	N/A
Otu1859	Sordariomycetes (0.83)	N/A
Otu1861	Sordariomycetes (0.99)	Sordariales (0.89)
Otu1863	Sordariomycetes (0.99)	Xylariales (0.99)
Otu1866	N/A	N/A
Otu1867	Dothideomycetes (0.97)	N/A
Otu1868	Leotiomycetes (0.94)	Helotiales (0.89)
Otu1870	Sordariomycetes (1.00)	Hypocreales (1.00)
Otu1872	N/A	N/A
Otu1875	N/A	N/A
Otu1876	Lecanoromycetes (0.95)	Caliciales (0.9)
Otu1877	N/A	N/A
Otu1879	Sordariomycetes (0.98)	Hypocreales (0.98)
Otu1880	Sordariomycetes (0.98)	Microascales (0.9)
Otu1882	Lecanoromycetes (1.00)	Lecanorales (1.00)
Otu1883	Sordariomycetes (0.89)	N/A
Otu1884	N/A	N/A
Otu1888	N/A	N/A
Otu1889	N/A	N/A
Otu189	N/A	N/A
Otu1890	N/A	N/A
Otu1892	N/A	N/A
Otu1893	N/A	N/A
Otu1896	Sordariomycetes (1.00)	Xylariales (1.00)
Otu1898	N/A	N/A
Otu1899	N/A	N/A
Otu190	Eurotiomycetes (0.87)	N/A
Otu1902	N/A	N/A
Otu1906	Sordariomycetes (0.94)	N/A
Otu1907	Sordariomycetes (0.91)	N/A
Otu1909	Sordariomycetes (0.93)	N/A
Otu191	Sordariomycetes (0.8)	N/A
Otu1911	Dothideomycetes (1.00)	Capnodiales (1.00)
Otu1912	Sordariomycetes (0.95)	Xylariales (0.85)
Otu1913	Dothideomycetes (1.00)	Capnodiales (1.00)
Otu1916	N/A	N/A
Otu1917	N/A	N/A
Otu1918	Sordariomycetes (0.91)	N/A
Otu1919	Sordariomycetes (0.95)	N/A
Otu1920	N/A	N/A
Otu1921	Sordariomycetes (0.92)	N/A
Otu1922	Sordariomycetes (1.00)	Hypocreales (1.00)
Otu1926	Sordariomycetes (0.95)	N/A
Otu1928	N/A	N/A
Otu193	Dothideomycetes (1.00)	Pleosporales (1.00)
Otu1930	Dothideomycetes (1.00)	Pleosporales (1.00)
Otu1931	Sordariomycetes (0.89)	N/A
Otu1935	Sordariomycetes (1.00)	Hypocreales (1.00)
Otu1936	Sordariomycetes (0.85)	N/A
Otu1938	Dothideomycetes (0.94)	Pleosporales (0.91)
Otu1939	N/A	N/A
Otu194	Sordariomycetes (0.94)	Xylariales (0.94)
Otu1940	Sordariomycetes (0.99)	Sordariales (0.98)
Otu1942	Leotiomycetes (0.8)	N/A
Otu1943	Sordariomycetes (1.00)	Xylariales (1.00)
Otu1944	Sordariomycetes (0.8)	N/A
Otu1946	Sordariomycetes (0.99)	Xylariales (0.96)
Otu1947	N/A	N/A
Otu1948	Sordariomycetes (0.95)	Hypocreales (0.83)
Otu1949	Leotiomycetes (0.86)	Helotiales (0.84)
Otu195	Sordariomycetes (1.00)	Xylariales (1.00)
Otu1950	Sordariomycetes (0.97)	Diaporthales (0.94)
Otu1952	Sordariomycetes (1.00)	Xylariales (1.00)
Otu1954	N/A	N/A
Otu1955	Sordariomycetes (0.99)	Hypocreales (0.96)
Otu1957	Lecanoromycetes (1.00)	Peltigerales (1.00)
Otu1958	N/A	N/A
Otu1959	Sordariomycetes (0.94)	Xylariales (0.9)
Otu196	Sordariomycetes (0.99)	N/A
Otu1960	N/A	N/A
Otu1962	Sordariomycetes (0.87)	Xylariales (0.87)
Otu1963	Sordariomycetes (0.85)	N/A
Otu1964	Dothideomycetes (1.00)	Pleosporales (1.00)
Otu1965	Sordariomycetes (0.98)	N/A
Otu1966	Sordariomycetes (0.95)	N/A
Otu1969	Sordariomycetes (0.98)	N/A
Otu1972	Eurotiomycetes (0.86)	Chaetothyriales (0.82)
Otu1973	Sordariomycetes (0.92)	N/A
Otu1974	Sordariomycetes (0.87)	N/A
Otu1976	Sordariomycetes (1.00)	Sordariales (1.00)
Otu1978	Sordariomycetes (0.96)	Xylariales (0.85)
Otu1979	Sordariomycetes (0.96)	Xylariales (0.87)
Otu1981	Sordariomycetes (0.97)	N/A
Otu1983	N/A	N/A
Otu1986	Sordariomycetes (0.88)	N/A
Otu1987	Sordariomycetes (0.92)	Xylariales (0.8)
Otu1988	N/A	N/A
Otu199	N/A	N/A
Otu1990	N/A	N/A
Otu1993	Sordariomycetes (0.93)	N/A
Otu1994	Sordariomycetes (0.93)	N/A
Otu1995	Sordariomycetes (0.98)	Glomerellales (0.93)
Otu1999	Sordariomycetes (0.89)	N/A
Otu20	N/A	N/A
Otu200	Sordariomycetes (0.81)	N/A
Otu2001	N/A	N/A
Otu2002	Leotiomycetes (0.87)	Helotiales (0.87)
Otu201	N/A	N/A
Otu2010	Sordariomycetes (1.00)	Hypocreales (0.99)
Otu2012	Saccharomycetes (1.00)	Saccharomycetales (1.00)
Otu2015	Sordariomycetes (0.93)	N/A
Otu2017	Saccharomycetes (0.93)	Saccharomycetales (0.93)
Otu2018	Dothideomycetes (0.8)	N/A
Otu202	Sordariomycetes (0.89)	N/A
Otu2020	Sordariomycetes (0.8)	N/A
Otu2023	Leotiomycetes (1.00)	Helotiales (1.00)
Otu2028	Sordariomycetes (1.00)	Hypocreales (1.00)
Otu2029	N/A	N/A
Otu203	Sordariomycetes (0.89)	N/A
Otu2030	Sordariomycetes (0.9)	N/A
Otu2032	Sordariomycetes (0.83)	N/A
Otu2033	Orbiliomycetes (0.91)	N/A
Otu2034	Eurotiomycetes (0.99)	Chaetothyriales (0.99)
Otu2035	Sordariomycetes (0.8)	N/A
Otu2036	Leotiomycetes (0.99)	Helotiales (0.99)
Otu2037	Dothideomycetes (0.84)	Capnodiales (0.81)
Otu2041	Sordariomycetes (0.92)	N/A
Otu2042	Eurotiomycetes (0.91)	Chaetothyriales (0.91)
Otu2046	N/A	N/A
Otu2048	Eurotiomycetes (1.00)	Chaetothyriales (1.00)
Otu2049	Sordariomycetes (0.99)	Xylariales (0.93)
Otu205	N/A	N/A
Otu2050	Sordariomycetes (0.98)	N/A
Otu2052	Dothideomycetes (0.97)	Capnodiales (0.97)
Otu2054	N/A	N/A
Otu2055	N/A	N/A
Otu2057	N/A	N/A
Otu2058	Leotiomycetes (1.00)	Rhytismatales (1.00)
Otu206	Sordariomycetes (0.96)	Hypocreales (0.9)
Otu2061	Eurotiomycetes (1.00)	Chaetothyriales (0.95)
Otu2064	Sordariomycetes (0.84)	N/A
Otu2067	Sordariomycetes (0.82)	N/A
Otu207	Sordariomycetes (0.95)	N/A
Otu2070	Sordariomycetes (0.99)	N/A
Otu2077	N/A	N/A
Otu2078	N/A	N/A
Otu2079	Sordariomycetes (0.94)	Xylariales (0.91)
Otu2084	Sordariomycetes (0.84)	N/A
Otu2085	Saccharomycetes (0.98)	Saccharomycetales (0.98)
Otu2086	N/A	N/A
Otu209	Sordariomycetes (0.82)	Xylariales (0.82)
Otu2090	Sordariomycetes (0.81)	N/A
Otu2091	N/A	N/A
Otu2095	N/A	N/A
Otu2096	N/A	N/A
Otu2097	Sordariomycetes (1.00)	Xylariales (1.00)
Otu21	Sordariomycetes (0.96)	N/A
Otu2102	Leotiomycetes (1.00)	Rhytismatales (0.99)
Otu2108	Sordariomycetes (0.99)	Diaporthales (0.99)
Otu2109	N/A	N/A
Otu2112	Sordariomycetes (0.94)	Hypocreales (0.89)
Otu2113	Leotiomycetes (0.82)	Helotiales (0.82)
Otu2116	Sordariomycetes (0.95)	N/A
Otu2119	Sordariomycetes (0.92)	N/A
Otu212	Dothideomycetes (1.00)	Myriangiales (1.00)
Otu2122	Sordariomycetes (1.00)	Xylariales (0.99)
Otu2126	Sordariomycetes (1.00)	Chaetosphaeriales (0.99)
Otu2128	Eurotiomycetes (0.98)	N/A
Otu2129	Dothideomycetes (1.00)	Asterinales (1.00)
Otu213	N/A	N/A
Otu2130	Sordariomycetes (0.81)	N/A
Otu2131	Eurotiomycetes (0.83)	N/A
Otu2133	Sordariomycetes (0.93)	N/A
Otu2136	Dothideomycetes (0.97)	N/A
Otu2138	N/A	N/A
Otu2139	Dothideomycetes (0.87)	Pleosporales (0.87)
Otu2140	Sordariomycetes (1.00)	Sordariomycetes_ord_Incertae_sedis (0.97)
Otu2141	Sordariomycetes (0.98)	Xylariales (0.98)
Otu2145	Leotiomycetes (1.00)	Helotiales (1.00)
Otu2146	Leotiomycetes (0.97)	Helotiales (0.97)
Otu2147	Sordariomycetes (0.99)	N/A
Otu215	Sordariomycetes (0.97)	N/A
Otu2150	Sordariomycetes (0.95)	Sordariales (0.93)
Otu2152	Sordariomycetes (0.94)	N/A
Otu2153	Sordariomycetes (0.95)	N/A
Otu2154	N/A	N/A
Otu2155	Sordariomycetes (0.95)	N/A
Otu2157	Eurotiomycetes (0.88)	Chaetothyriales (0.84)
Otu2158	Sordariomycetes (0.91)	Xylariales (0.81)
Otu216	Sordariomycetes (1.00)	Glomerellales (1.00)
Otu2160	Sordariomycetes (0.9)	N/A
Otu2161	Sordariomycetes (0.86)	N/A
Otu2163	Sordariomycetes (0.92)	N/A
Otu2164	N/A	N/A
Otu2165	Sordariomycetes (0.99)	Xylariales (0.99)
Otu2166	N/A	N/A
Otu2167	Pezizomycetes (1.00)	Pezizales (1.00)
Otu2170	N/A	N/A
Otu2171	Sordariomycetes (0.9)	Hypocreales (0.89)
Otu2175	Eurotiomycetes (0.98)	Chaetothyriales (0.98)
Otu2177	Sordariomycetes (0.99)	Xylariales (0.98)
Otu2178	Sordariomycetes (0.95)	N/A
Otu2179	Sordariomycetes (0.92)	N/A
Otu218	N/A	N/A
Otu2185	Sordariomycetes (0.98)	N/A
Otu219	N/A	N/A
Otu2191	Sordariomycetes (0.96)	N/A
Otu2194	Sordariomycetes (1.00)	Xylariales (1.00)
Otu2196	N/A	N/A
Otu2197	Dothideomycetes (0.88)	Capnodiales (0.82)
Otu22	Sordariomycetes (0.99)	Sordariales (0.98)
Otu220	Sordariomycetes (0.86)	N/A
Otu2200	N/A	N/A
Otu2207	Dothideomycetes (0.94)	Pleosporales (0.94)
Otu2208	Leotiomycetes (0.95)	N/A
Otu221	Dothideomycetes (0.86)	Pleosporales (0.86)
Otu2213	Leotiomycetes (1.00)	Helotiales (0.95)
Otu2214	Sordariomycetes (1.00)	Xylariales (1.00)
Otu2215	Sordariomycetes (0.98)	Xylariales (0.96)
Otu2218	Sordariomycetes (0.93)	N/A
Otu2219	Sordariomycetes (0.88)	Hypocreales (0.87)
Otu222	Sordariomycetes (0.91)	N/A
Otu2221	Sordariomycetes (0.86)	N/A
Otu2222	N/A	N/A
Otu2224	Sordariomycetes (0.84)	N/A
Otu223	Dothideomycetes (0.94)	Botryosphaeriales (0.94)
Otu2230	N/A	N/A
Otu2231	Sordariomycetes (0.99)	Magnaporthales (0.99)
Otu2232	N/A	N/A
Otu2233	Sordariomycetes (1.00)	Xylariales (1.00)
Otu2235	N/A	N/A
Otu2236	Sordariomycetes (0.94)	N/A
Otu2239	N/A	N/A
Otu224	Dothideomycetes (1.00)	Pleosporales (1.00)
Otu2241	Sordariomycetes (1.00)	Glomerellales (1.00)
Otu2242	Sordariomycetes (1.00)	Xylariales (1.00)
Otu2243	Sordariomycetes (0.92)	N/A
Otu2245	Sordariomycetes (0.98)	N/A
Otu2246	Sordariomycetes (0.81)	N/A
Otu2250	Sordariomycetes (0.95)	Xylariales (0.95)
Otu2251	Leotiomycetes (0.86)	Helotiales (0.84)
Otu2255	Sordariomycetes (0.98)	Xylariales (0.86)
Otu2258	N/A	N/A
Otu226	Sordariomycetes (0.99)	Hypocreales (0.99)
Otu2261	Sordariomycetes (1.00)	Xylariales (0.99)
Otu2266	Dothideomycetes (0.96)	Dothideales (0.96)
Otu2267	Sordariomycetes (0.93)	N/A
Otu2269	Sordariomycetes (0.89)	N/A
Otu227	Dothideomycetes (1.00)	Pleosporales (1.00)
Otu2270	N/A	N/A
Otu2276	Sordariomycetes (0.96)	Hypocreales (0.96)
Otu228	Leotiomycetes (1.00)	Helotiales (1.00)
Otu2280	N/A	N/A
Otu2281	N/A	N/A
Otu2282	Sordariomycetes (0.93)	N/A
Otu2284	Sordariomycetes (0.99)	Xylariales (0.96)
Otu2286	Orbiliomycetes (0.98)	N/A
Otu2287	Sordariomycetes (0.97)	N/A
Otu2288	Sordariomycetes (1.00)	Xylariales (1.00)
Otu229	N/A	N/A
Otu2293	Sordariomycetes (0.91)	Xylariales (0.8)
Otu2294	N/A	N/A
Otu2299	Sordariomycetes (0.95)	N/A
Otu2301	Sordariomycetes (0.81)	N/A
Otu2302	Sordariomycetes (0.99)	Diaporthales (0.98)
Otu2307	N/A	N/A
Otu2309	N/A	N/A
Otu2313	N/A	N/A
Otu2315	Sordariomycetes (1.00)	Xylariales (1.00)
Otu2317	N/A	N/A
Otu2318	Sordariomycetes (0.83)	N/A
Otu2319	Sordariomycetes (0.97)	N/A
Otu232	N/A	N/A
Otu2322	Dothideomycetes (1.00)	Pleosporales (1.00)
Otu2323	N/A	N/A
Otu2326	Sordariomycetes (1.00)	Chaetosphaeriales (1.00)
Otu2327	N/A	N/A
Otu2328	Eurotiomycetes (1.00)	Chaetothyriales (1.00)
Otu2329	Eurotiomycetes (0.84)	N/A
Otu233	Sordariomycetes (1.00)	N/A
Otu2330	Sordariomycetes (0.86)	Xylariales (0.85)
Otu2332	Sordariomycetes (0.99)	Sordariales (0.91)
Otu2333	Sordariomycetes (0.97)	N/A
Otu2334	N/A	N/A
Otu2335	Sordariomycetes (1.00)	Hypocreales (1.00)
Otu2337	N/A	N/A
Otu2338	Sordariomycetes (0.88)	N/A
Otu2344	Sordariomycetes (1.00)	Xylariales (1.00)
Otu2345	Lecanoromycetes (0.87)	N/A
Otu2346	Sordariomycetes (0.86)	N/A
Otu2348	Leotiomycetes (1.00)	Helotiales (1.00)
Otu2349	Sordariomycetes (0.96)	Xylariales (0.95)
Otu235	N/A	N/A
Otu2354	N/A	N/A
Otu2358	Sordariomycetes (0.86)	N/A
Otu236	Sordariomycetes (0.97)	N/A
Otu2360	N/A	N/A
Otu2363	Sordariomycetes (0.88)	N/A
Otu2364	N/A	N/A
Otu2366	Sordariomycetes (0.91)	N/A
Otu2369	Sordariomycetes (0.94)	N/A
Otu238	Sordariomycetes (1.00)	Hypocreales (0.97)
Otu2385	N/A	N/A
Otu2386	Sordariomycetes (0.98)	Diaporthales (0.97)
Otu2387	Sordariomycetes (1.00)	N/A
Otu2388	Sordariomycetes (0.84)	N/A
Otu2389	Sordariomycetes (1.00)	Sordariales (1.00)
Otu2390	Dothideomycetes (0.96)	Pleosporales (0.95)
Otu2392	Sordariomycetes (0.97)	Xylariales (0.97)
Otu2394	Sordariomycetes (1.00)	Xylariales (1.00)
Otu2396	Dothideomycetes (0.98)	Venturiales (0.98)
Otu2397	Eurotiomycetes (0.94)	Chaetothyriales (0.89)
Otu2399	Eurotiomycetes (0.85)	Chaetothyriales (0.82)
Otu240	Sordariomycetes (1.00)	Xylariales (1.00)
Otu2403	Sordariomycetes (0.94)	N/A
Otu2405	Sordariomycetes (1.00)	Sordariales (1.00)
Otu241	N/A	N/A
Otu2415	Leotiomycetes (0.92)	Helotiales (0.91)
Otu242	Sordariomycetes (1.00)	Hypocreales (1.00)
Otu2421	N/A	N/A
Otu2422	Eurotiomycetes (0.97)	Chaetothyriales (0.96)
Otu2424	Leotiomycetes (0.81)	Helotiales (0.81)
Otu2426	N/A	N/A
Otu2427	Sordariomycetes (1.00)	Sordariales (1.00)
Otu2429	Sordariomycetes (1.00)	Xylariales (1.00)
Otu243	Dothideomycetes (0.95)	Botryosphaeriales (0.95)
Otu2430	Sordariomycetes (0.93)	Chaetosphaeriales (0.9)
Otu2431	Sordariomycetes (0.84)	N/A
Otu2432	Dothideomycetes (0.92)	Capnodiales (0.91)
Otu2434	Sordariomycetes (1.00)	Microascales (0.87)
Otu2435	N/A	N/A
Otu2437	Sordariomycetes (0.96)	N/A
Otu2438	Sordariomycetes (0.93)	N/A
Otu2439	N/A	N/A
Otu244	Dothideomycetes (1.00)	Capnodiales (1.00)
Otu2440	N/A	N/A
Otu2444	Sordariomycetes (1.00)	Xylariales (0.96)
Otu2445	N/A	N/A
Otu2448	Sordariomycetes (0.9)	N/A
Otu2449	Sordariomycetes (1.00)	Xylariales (1.00)
Otu2450	Sordariomycetes (0.99)	Xylariales (0.98)
Otu2454	N/A	N/A
Otu2457	Sordariomycetes (0.98)	N/A
Otu2458	Dothideomycetes (1.00)	Venturiales (1.00)
Otu2459	Sordariomycetes (0.85)	N/A
Otu246	Eurotiomycetes (0.84)	Chaetothyriales (0.82)
Otu2464	N/A	N/A
Otu2466	Sordariomycetes (0.94)	Xylariales (0.94)
Otu2468	N/A	N/A
Otu2470	N/A	N/A
Otu2473	Sordariomycetes (0.94)	N/A
Otu2481	Sordariomycetes (1.00)	N/A
Otu2487	Sordariomycetes (1.00)	Hypocreales (1.00)
Otu2488	N/A	N/A
Otu2489	Sordariomycetes (0.87)	N/A
Otu249	Sordariomycetes (1.00)	Xylariales (1.00)
Otu2493	Dothideomycetes (0.92)	N/A
Otu2496	Sordariomycetes (1.00)	Xylariales (0.99)
Otu250	Dothideomycetes (1.00)	Capnodiales (1.00)
Otu2512	Dothideomycetes (1.00)	Pleosporales (0.99)
Otu2514	Leotiomycetes (1.00)	Rhytismatales (1.00)
Otu2516	N/A	N/A
Otu2517	Sordariomycetes (1.00)	Glomerellales (0.94)
Otu252	Sordariomycetes (0.85)	N/A
Otu2523	Sordariomycetes (1.00)	Hypocreales (1.00)
Otu2526	Dothideomycetes (1.00)	Pleosporales (1.00)
Otu253	Sordariomycetes (0.96)	N/A
Otu2533	Dothideomycetes (0.83)	Pleosporales (0.82)
Otu2535	Sordariomycetes (1.00)	Hypocreales (0.99)
Otu2540	Sordariomycetes (0.92)	N/A
Otu2544	Sordariomycetes (0.96)	Hypocreales (0.95)
Otu2545	N/A	N/A
Otu2546	Sordariomycetes (0.89)	N/A
Otu2548	N/A	N/A
Otu2555	Dothideomycetes (0.95)	Pleosporales (0.95)
Otu2557	Dothideomycetes (0.99)	Pleosporales (0.99)
Otu2559	Sordariomycetes (1.00)	N/A
Otu256	Sordariomycetes (0.87)	N/A
Otu2560	Sordariomycetes (0.84)	N/A
Otu2562	Sordariomycetes (0.89)	N/A
Otu2563	N/A	N/A
Otu257	N/A	N/A
Otu2570	Sordariomycetes (0.95)	N/A
Otu2572	Sordariomycetes (0.94)	N/A
Otu2573	Sordariomycetes (0.97)	N/A
Otu2574	N/A	N/A
Otu2576	Lecanoromycetes (0.96)	Peltigerales (0.96)
Otu2577	Sordariomycetes (0.92)	Xylariales (0.92)
Otu2578	Sordariomycetes (0.98)	Hypocreales (0.98)
Otu258	N/A	N/A
Otu2580	Sordariomycetes (1.00)	Microascales (0.92)
Otu2585	Dothideomycetes (0.81)	N/A
Otu2588	Sordariomycetes (0.98)	Xylariales (0.88)
Otu2589	Lecanoromycetes (0.82)	N/A
Otu259	Sordariomycetes (0.98)	Hypocreales (0.95)
Otu2591	Eurotiomycetes (0.88)	N/A
Otu2592	Sordariomycetes (1.00)	Xylariales (1.00)
Otu2595	Sordariomycetes (0.85)	Sordariales (0.84)
Otu2597	Leotiomycetes (0.93)	Helotiales (0.93)
Otu2598	Dothideomycetes (1.00)	Pleosporales (1.00)
Otu26	Sordariomycetes (1.00)	Diaporthales (1.00)
Otu260	Sordariomycetes (0.97)	N/A
Otu2601	Sordariomycetes (0.91)	N/A
Otu2603	Eurotiomycetes (0.91)	Chaetothyriales (0.84)
Otu2604	Eurotiomycetes (0.93)	Chaetothyriales (0.92)
Otu2606	N/A	N/A
Otu261	Eurotiomycetes (0.96)	Chaetothyriales (0.96)
Otu2611	Dothideomycetes (0.98)	Pleosporales (0.98)
Otu2612	Sordariomycetes (0.97)	Xylariales (0.96)
Otu2614	N/A	N/A
Otu2618	Sordariomycetes (1.00)	Xylariales (1.00)
Otu2619	Sordariomycetes (0.88)	N/A
Otu262	N/A	N/A
Otu2620	Dothideomycetes (0.99)	Capnodiales (0.99)
Otu2623	N/A	N/A
Otu2625	Dothideomycetes (0.96)	N/A
Otu2626	Sordariomycetes (0.96)	Xylariales (0.88)
Otu2628	Leotiomycetes (1.00)	Helotiales (1.00)
Otu263	Sordariomycetes (0.98)	Xylariales (0.84)
Otu2634	Sordariomycetes (0.93)	Xylariales (0.88)
Otu2639	Sordariomycetes (1.00)	N/A
Otu264	Eurotiomycetes (0.9)	Chaetothyriales (0.9)
Otu2640	Dothideomycetes (0.92)	N/A
Otu2641	N/A	N/A
Otu2644	Leotiomycetes (0.86)	N/A
Otu2646	Sordariomycetes (1.00)	Xylariales (0.99)
Otu2647	Dothideomycetes (0.82)	N/A
Otu2648	Sordariomycetes (1.00)	Hypocreales (1.00)
Otu2652	N/A	N/A
Otu266	Sordariomycetes (0.99)	N/A
Otu2664	Lecanoromycetes (0.83)	N/A
Otu2665	Sordariomycetes (0.87)	N/A
Otu267	N/A	N/A
Otu2670	N/A	N/A
Otu2671	Sordariomycetes (1.00)	Hypocreales (1.00)
Otu2677	N/A	N/A
Otu268	Dothideomycetes (1.00)	Capnodiales (1.00)
Otu2680	Sordariomycetes (0.91)	Xylariales (0.82)
Otu2681	Sordariomycetes (0.91)	Xylariales (0.87)
Otu2682	Sordariomycetes (0.94)	N/A
Otu2684	Sordariomycetes (0.95)	N/A
Otu2686	Sordariomycetes (1.00)	N/A
Otu2687	Sordariomycetes (1.00)	Xylariales (1.00)
Otu2689	Sordariomycetes (0.88)	Xylariales (0.83)
Otu2692	Sordariomycetes (1.00)	Hypocreales (1.00)
Otu2693	Sordariomycetes (0.93)	Xylariales (0.86)
Otu2696	N/A	N/A
Otu27	Dothideomycetes (0.96)	Capnodiales (0.82)
Otu270	Sordariomycetes (0.93)	Xylariales (0.9)
Otu2704	Dothideomycetes (0.83)	N/A
Otu271	N/A	N/A
Otu2710	Sordariomycetes (0.83)	Xylariales (0.82)
Otu2711	Sordariomycetes (0.96)	Hypocreales (0.96)
Otu2714	Sordariomycetes (0.96)	Xylariales (0.9)
Otu2716	N/A	N/A
Otu2718	Dothideomycetes (0.87)	N/A
Otu2719	Sordariomycetes (0.99)	Xylariales (0.97)
Otu272	Eurotiomycetes (1.00)	Chaetothyriales (1.00)
Otu2722	N/A	N/A
Otu2725	Orbiliomycetes (0.85)	N/A
Otu2727	Sordariomycetes (1.00)	Glomerellales (0.95)
Otu2729	Sordariomycetes (0.94)	N/A
Otu273	Sordariomycetes (1.00)	Xylariales (1.00)
Otu2733	Dothideomycetes (0.99)	Capnodiales (0.99)
Otu2738	Dothideomycetes (0.9)	Capnodiales (0.9)
Otu274	Sordariomycetes (0.92)	N/A
Otu2745	Eurotiomycetes (0.98)	Chaetothyriales (0.98)
Otu2748	Sordariomycetes (0.93)	N/A
Otu275	Sordariomycetes (0.98)	Xylariales (0.88)
Otu2751	Dothideomycetes (0.81)	N/A
Otu2752	Dothideomycetes (0.98)	N/A
Otu2754	Sordariomycetes (1.00)	Sordariales (0.98)
Otu2755	Leotiomycetes (0.98)	Helotiales (0.98)
Otu2758	N/A	N/A
Otu2761	Sordariomycetes (0.96)	Hypocreales (0.88)
Otu2762	Sordariomycetes (0.9)	Xylariales (0.82)
Otu2764	Sordariomycetes (0.89)	N/A
Otu2766	Dothideomycetes (0.96)	Capnodiales (0.96)
Otu2769	N/A	N/A
Otu2772	Sordariomycetes (0.94)	Xylariales (0.84)
Otu2775	N/A	N/A
Otu2776	Dothideomycetes (0.93)	Pleosporales (0.92)
Otu2777	Sordariomycetes (1.00)	Glomerellales (1.00)
Otu2779	Sordariomycetes (0.95)	Hypocreales (0.9)
Otu2781	Sordariomycetes (0.99)	N/A
Otu2782	N/A	N/A
Otu2783	Lecanoromycetes (1.00)	Lecanorales (0.98)
Otu2784	Sordariomycetes (1.00)	Xylariales (1.00)
Otu2786	Sordariomycetes (0.98)	N/A
Otu2789	Sordariomycetes (1.00)	Chaetosphaeriales (0.99)
Otu279	Sordariomycetes (1.00)	Sordariales (0.97)
Otu2793	Sordariomycetes (0.99)	Sordariales (0.87)
Otu2795	N/A	N/A
Otu2796	Sordariomycetes (0.85)	N/A
Otu2797	Sordariomycetes (1.00)	Xylariales (0.99)
Otu2798	Sordariomycetes (1.00)	Diaporthales (1.00)
Otu28	Sordariomycetes (0.99)	N/A
Otu280	Sordariomycetes (0.82)	Hypocreales (0.82)
Otu2802	N/A	N/A
Otu2803	Sordariomycetes (0.97)	Xylariales (0.83)
Otu2807	Sordariomycetes (0.94)	Diaporthales (0.94)
Otu2809	Sordariomycetes (1.00)	Microascales (0.9)
Otu2812	Sordariomycetes (0.95)	N/A
Otu2814	Leotiomycetes (0.96)	Helotiales (0.96)
Otu2815	Sordariomycetes (0.97)	N/A
Otu2817	Sordariomycetes (0.97)	N/A
Otu2818	Sordariomycetes (0.82)	N/A
Otu2819	Sordariomycetes (0.9)	Xylariales (0.85)
Otu282	Sordariomycetes (1.00)	N/A
Otu2822	Sordariomycetes (1.00)	N/A
Otu2825	Sordariomycetes (0.97)	N/A
Otu2828	Sordariomycetes (1.00)	Xylariales (1.00)
Otu283	Sordariomycetes (0.84)	N/A
Otu2830	Sordariomycetes (0.98)	N/A
Otu2831	N/A	N/A
Otu2834	Sordariomycetes (0.95)	Xylariales (0.95)
Otu2838	N/A	N/A
Otu2841	Dothideomycetes (0.97)	Pleosporales (0.96)
Otu2843	Sordariomycetes (0.87)	N/A
Otu2844	Eurotiomycetes (1.00)	Chaetothyriales (1.00)
Otu2847	Sordariomycetes (0.95)	Xylariales (0.95)
Otu2848	Sordariomycetes (0.91)	N/A
Otu2849	Sordariomycetes (0.92)	N/A
Otu285	Sordariomycetes (0.97)	N/A
Otu2852	Sordariomycetes (0.84)	N/A
Otu2855	Sordariomycetes (1.00)	N/A
Otu2858	Sordariomycetes (0.84)	N/A
Otu286	Sordariomycetes (1.00)	N/A
Otu2861	Sordariomycetes (0.96)	Xylariales (0.96)
Otu2864	N/A	N/A
Otu2866	N/A	N/A
Otu2867	Sordariomycetes (0.91)	N/A
Otu287	N/A	N/A
Otu2873	N/A	N/A
Otu2875	Sordariomycetes (1.00)	N/A
Otu2876	Sordariomycetes (1.00)	N/A
Otu288	Dothideomycetes (1.00)	Capnodiales (1.00)
Otu2881	Sordariomycetes (1.00)	Togniniales (0.95)
Otu2883	Sordariomycetes (0.99)	Xylariales (0.99)
Otu2886	Sordariomycetes (0.88)	N/A
Otu2889	N/A	N/A
Otu2891	N/A	N/A
Otu2894	Sordariomycetes (0.9)	N/A
Otu2895	N/A	N/A
Otu2897	Sordariomycetes (0.97)	Xylariales (0.97)
Otu29	Sordariomycetes (1.00)	Hypocreales (1.00)
Otu290	Dothideomycetes (1.00)	Pleosporales (0.97)
Otu2901	Sordariomycetes (0.91)	N/A
Otu2903	Sordariomycetes (0.95)	N/A
Otu2904	N/A	N/A
Otu2906	Eurotiomycetes (0.87)	Chaetothyriales (0.87)
Otu2907	Sordariomycetes (0.85)	N/A
Otu2909	N/A	N/A
Otu291	Sordariomycetes (0.89)	N/A
Otu2910	Sordariomycetes (0.95)	Xylariales (0.92)
Otu2911	Sordariomycetes (0.9)	N/A
Otu2912	Sordariomycetes (0.82)	N/A
Otu2913	Leotiomycetes (0.83)	Helotiales (0.83)
Otu2915	Sordariomycetes (1.00)	Boliniales (1.00)
Otu2917	Sordariomycetes (0.89)	N/A
Otu2919	N/A	N/A
Otu292	Sordariomycetes (0.96)	Glomerellales (0.94)
Otu2920	N/A	N/A
Otu2922	N/A	N/A
Otu2925	N/A	N/A
Otu293	Sordariomycetes (1.00)	Xylariales (1.00)
Otu2932	Sordariomycetes (0.98)	Xylariales (0.81)
Otu2933	N/A	N/A
Otu2938	Sordariomycetes (0.98)	Xylariales (0.96)
Otu294	Dothideomycetes (0.98)	Capnodiales (0.83)
Otu2941	Sordariomycetes (0.83)	N/A
Otu2944	Sordariomycetes (0.9)	Xylariales (0.87)
Otu2945	Lecanoromycetes (0.98)	Lecanorales (0.98)
Otu2947	Sordariomycetes (0.93)	Xylariales (0.88)
Otu2948	N/A	N/A
Otu2949	Dothideomycetes (0.85)	Capnodiales (0.85)
Otu295	Sordariomycetes (0.95)	N/A
Otu2951	Leotiomycetes (0.98)	Helotiales (0.98)
Otu2952	N/A	N/A
Otu2957	N/A	N/A
Otu2959	N/A	N/A
Otu296	Leotiomycetes (0.91)	Helotiales (0.9)
Otu2961	Sordariomycetes (1.00)	Xylariales (1.00)
Otu2966	Sordariomycetes (1.00)	Glomerellales (1.00)
Otu2967	N/A	N/A
Otu297	Dothideomycetes (1.00)	Capnodiales (1.00)
Otu2972	Sordariomycetes (0.84)	Hypocreales (0.83)
Otu2973	Sordariomycetes (0.97)	Microascales (0.84)
Otu2975	Sordariomycetes (0.84)	N/A
Otu2977	Eurotiomycetes (1.00)	Chaetothyriales (0.99)
Otu2978	N/A	N/A
Otu2979	Dothideomycetes (0.88)	N/A
Otu298	Sordariomycetes (0.96)	Chaetosphaeriales (0.93)
Otu2982	Eurotiomycetes (0.93)	N/A
Otu2985	Sordariomycetes (0.92)	N/A
Otu2988	N/A	N/A
Otu2989	Sordariomycetes (0.94)	N/A
Otu2991	Sordariomycetes (0.86)	N/A
Otu2993	Leotiomycetes (0.86)	Helotiales (0.85)
Otu2994	N/A	N/A
Otu2996	Sordariomycetes (1.00)	Hypocreales (1.00)
Otu2998	N/A	N/A
Otu30	Leotiomycetes (1.00)	Helotiales (1.00)
Otu300	Sordariomycetes (1.00)	Hypocreales (1.00)
Otu3000	Sordariomycetes (0.98)	Xylariales (0.95)
Otu3003	Sordariomycetes (1.00)	N/A
Otu3006	Sordariomycetes (0.95)	Chaetosphaeriales (0.86)
Otu3008	Sordariomycetes (0.95)	N/A
Otu301	Sordariomycetes (0.95)	Hypocreales (0.95)
Otu3013	Sordariomycetes (0.96)	Xylariales (0.96)
Otu3014	N/A	N/A
Otu3015	Leotiomycetes (0.99)	Helotiales (0.99)
Otu3016	Sordariomycetes (0.85)	Diaporthales (0.85)
Otu3019	Sordariomycetes (1.00)	Hypocreales (1.00)
Otu302	Sordariomycetes (0.91)	Xylariales (0.9)
Otu3023	Sordariomycetes (0.8)	N/A
Otu3024	N/A	N/A
Otu3026	Eurotiomycetes (1.00)	Eurotiales (1.00)
Otu3028	Eurotiomycetes (0.85)	Chaetothyriales (0.85)
Otu3029	Leotiomycetes (1.00)	Helotiales (1.00)
Otu303	Sordariomycetes (0.96)	Xylariales (0.81)
Otu3036	Sordariomycetes (0.92)	N/A
Otu3037	Sordariomycetes (0.95)	N/A
Otu3038	Sordariomycetes (0.8)	Hypocreales (0.8)
Otu304	Sordariomycetes (0.99)	Microascales (0.93)
Otu3041	N/A	N/A
Otu3042	Sordariomycetes (0.97)	Xylariales (0.88)
Otu3046	Sordariomycetes (0.92)	Xylariales (0.88)
Otu3050	Sordariomycetes (0.85)	Myrmecridiales (0.85)
Otu3052	Sordariomycetes (1.00)	Glomerellales (1.00)
Otu3057	Sordariomycetes (1.00)	Microascales (0.96)
Otu3058	N/A	N/A
Otu3063	Sordariomycetes (0.81)	N/A
Otu3065	Sordariomycetes (0.87)	N/A
Otu3066	N/A	N/A
Otu307	Dothideomycetes (1.00)	N/A
Otu3071	Sordariomycetes (0.84)	N/A
Otu3075	Sordariomycetes (0.93)	N/A
Otu3076	Dothideomycetes (0.89)	Capnodiales (0.89)
Otu3078	Sordariomycetes (1.00)	Xylariales (1.00)
Otu3083	N/A	N/A
Otu3084	Sordariomycetes (0.99)	N/A
Otu3085	N/A	N/A
Otu3087	Sordariomycetes (0.87)	Hypocreales (0.87)
Otu3088	N/A	N/A
Otu3089	Sordariomycetes (0.88)	N/A
Otu309	Sordariomycetes (0.96)	Xylariales (0.96)
Otu3091	Sordariomycetes (0.89)	N/A
Otu3092	Pezizomycetes (1.00)	Pezizales (1.00)
Otu3094	N/A	N/A
Otu3095	Sordariomycetes (0.9)	N/A
Otu3097	Sordariomycetes (0.81)	N/A
Otu3099	Sordariomycetes (0.87)	N/A
Otu31	N/A	N/A
Otu310	Leotiomycetes (1.00)	Helotiales (1.00)
Otu3101	Sordariomycetes (0.88)	N/A
Otu3102	Sordariomycetes (1.00)	Xylariales (1.00)
Otu3103	Sordariomycetes (0.87)	N/A
Otu3109	Sordariomycetes (0.94)	N/A
Otu311	Sordariomycetes (0.94)	Xylariales (0.94)
Otu3110	N/A	N/A
Otu3114	Sordariomycetes (0.94)	Xylariales (0.82)
Otu3117	Sordariomycetes (0.96)	N/A
Otu3118	Sordariomycetes (0.81)	N/A
Otu3119	Sordariomycetes (1.00)	Xylariales (1.00)
Otu3122	Sordariomycetes (0.95)	N/A
Otu3123	Sordariomycetes (1.00)	Xylariales (1.00)
Otu3124	Dothideomycetes (0.87)	Pleosporales (0.83)
Otu3125	Sordariomycetes (0.84)	N/A
Otu313	Lecanoromycetes (0.99)	Ostropales (0.99)
Otu3131	Sordariomycetes (0.88)	N/A
Otu3134	N/A	N/A
Otu3135	N/A	N/A
Otu314	Sordariomycetes (1.00)	Microascales (0.87)
Otu3140	Dothideomycetes (1.00)	Pleosporales (1.00)
Otu3144	Sordariomycetes (0.8)	N/A
Otu3148	Sordariomycetes (0.96)	Xylariales (0.83)
Otu3151	Sordariomycetes (1.00)	Hypocreales (1.00)
Otu3152	Sordariomycetes (0.85)	N/A
Otu3153	Sordariomycetes (0.9)	N/A
Otu3154	N/A	N/A
Otu3155	Sordariomycetes (0.9)	Xylariales (0.89)
Otu3157	N/A	N/A
Otu3158	Sordariomycetes (1.00)	Xylariales (1.00)
Otu3159	Sordariomycetes (1.00)	Chaetosphaeriales (0.83)
Otu316	Sordariomycetes (0.85)	Xylariales (0.85)
Otu3161	Sordariomycetes (0.94)	Xylariales (0.84)
Otu3163	Sordariomycetes (0.99)	Xylariales (0.97)
Otu3166	Sordariomycetes (1.00)	N/A
Otu3168	Eurotiomycetes (0.86)	Chaetothyriales (0.86)
Otu3169	Dothideomycetes (0.98)	Pleosporales (0.98)
Otu3170	N/A	N/A
Otu3174	N/A	N/A
Otu3176	Dothideomycetes (0.9)	Venturiales (0.9)
Otu3177	Dothideomycetes (0.87)	N/A
Otu3179	Dothideomycetes (1.00)	Pleosporales (1.00)
Otu318	Dothideomycetes (1.00)	Pleosporales (0.85)
Otu3180	Dothideomycetes (0.98)	Botryosphaeriales (0.98)
Otu3181	N/A	N/A
Otu3182	Sordariomycetes (1.00)	Xylariales (0.99)
Otu3184	Sordariomycetes (0.83)	Xylariales (0.83)
Otu3185	N/A	N/A
Otu3187	Dothideomycetes (0.91)	N/A
Otu3189	Dothideomycetes (0.91)	Pleosporales (0.91)
Otu3190	Sordariomycetes (1.00)	Xylariales (1.00)
Otu3191	N/A	N/A
Otu3192	Dothideomycetes (0.81)	N/A
Otu3193	Sordariomycetes (0.89)	N/A
Otu3195	Leotiomycetes (0.96)	Helotiales (0.96)
Otu3196	Dothideomycetes (0.88)	Capnodiales (0.86)
Otu3197	Sordariomycetes (0.85)	N/A
Otu320	Sordariomycetes (0.93)	Xylariales (0.88)
Otu3201	Sordariomycetes (0.88)	N/A
Otu3203	Eurotiomycetes (0.88)	Chaetothyriales (0.88)
Otu3206	Dothideomycetes (0.98)	Capnodiales (0.82)
Otu3207	N/A	N/A
Otu3208	Sordariomycetes (1.00)	Xylariales (1.00)
Otu321	N/A	N/A
Otu3210	N/A	N/A
Otu3212	Sordariomycetes (0.97)	N/A
Otu3214	Sordariomycetes (0.97)	Sordariales (0.92)
Otu3216	Sordariomycetes (0.92)	N/A
Otu3217	Saccharomycetes (1.00)	Saccharomycetales (1.00)
Otu322	Leotiomycetes (1.00)	Helotiales (0.98)
Otu3221	Sordariomycetes (1.00)	Xylariales (0.94)
Otu3225	Sordariomycetes (0.86)	Xylariales (0.86)
Otu3229	Sordariomycetes (0.86)	N/A
Otu323	Sordariomycetes (0.98)	N/A
Otu3230	Dothideomycetes (0.99)	Botryosphaeriales (0.97)
Otu3231	Sordariomycetes (0.98)	N/A
Otu3233	Sordariomycetes (0.91)	N/A
Otu3234	N/A	N/A
Otu3236	N/A	N/A
Otu3237	N/A	N/A
Otu3239	Dothideomycetes (0.91)	N/A
Otu324	Sordariomycetes (0.99)	Xylariales (0.99)
Otu3240	Sordariomycetes (0.9)	N/A
Otu3243	Dothideomycetes (0.88)	Capnodiales (0.86)
Otu3244	N/A	N/A
Otu3245	Sordariomycetes (0.93)	Hypocreales (0.82)
Otu3248	N/A	N/A
Otu3250	Sordariomycetes (1.00)	Xylariales (0.98)
Otu3252	Sordariomycetes (0.89)	N/A
Otu3254	Dothideomycetes (0.81)	N/A
Otu3255	Eurotiomycetes (0.83)	N/A
Otu3257	Eurotiomycetes (1.00)	Chaetothyriales (1.00)
Otu3260	Leotiomycetes (0.98)	Helotiales (0.95)
Otu3261	Sordariomycetes (1.00)	Xylariales (1.00)
Otu3262	N/A	N/A
Otu3266	Sordariomycetes (0.83)	N/A
Otu3267	Sordariomycetes (0.99)	Hypocreales (0.99)
Otu327	Eurotiomycetes (0.93)	Chaetothyriales (0.89)
Otu3271	N/A	N/A
Otu3273	Sordariomycetes (0.88)	Xylariales (0.88)
Otu3275	N/A	N/A
Otu3278	Sordariomycetes (1.00)	Xylariales (1.00)
Otu3279	Sordariomycetes (1.00)	Xylariales (1.00)
Otu3281	Eurotiomycetes (1.00)	Chaetothyriales (1.00)
Otu3282	Sordariomycetes (1.00)	Xylariales (1.00)
Otu3283	Sordariomycetes (0.93)	Hypocreales (0.93)
Otu3284	Sordariomycetes (0.97)	N/A
Otu3285	Sordariomycetes (0.89)	Xylariales (0.89)
Otu3287	Leotiomycetes (1.00)	Helotiales (1.00)
Otu3288	N/A	N/A
Otu3291	Sordariomycetes (1.00)	Xylariales (1.00)
Otu3292	Leotiomycetes (0.96)	Helotiales (0.96)
Otu3293	N/A	N/A
Otu3296	Sordariomycetes (0.92)	N/A
Otu33	Sordariomycetes (1.00)	Glomerellales (1.00)
Otu3302	Sordariomycetes (0.91)	N/A
Otu3305	Sordariomycetes (0.9)	N/A
Otu3306	Sordariomycetes (0.82)	N/A
Otu3309	Leotiomycetes (0.95)	Helotiales (0.95)
Otu3310	N/A	N/A
Otu3313	Sordariomycetes (0.89)	Xylariales (0.85)
Otu3315	N/A	N/A
Otu3317	Sordariomycetes (0.92)	Hypocreales (0.87)
Otu3319	N/A	N/A
Otu3320	N/A	N/A
Otu3322	N/A	N/A
Otu3323	Sordariomycetes (0.94)	Xylariales (0.92)
Otu3324	N/A	N/A
Otu3325	N/A	N/A
Otu3326	Leotiomycetes (0.98)	Helotiales (0.97)
Otu3327	Sordariomycetes (1.00)	Glomerellales (0.99)
Otu3328	Sordariomycetes (0.85)	N/A
Otu3329	Leotiomycetes (0.98)	Helotiales (0.98)
Otu333	Dothideomycetes (1.00)	Venturiales (1.00)
Otu3332	N/A	N/A
Otu3333	N/A	N/A
Otu3338	N/A	N/A
Otu334	Sordariomycetes (0.99)	Xylariales (0.96)
Otu3340	N/A	N/A
Otu3342	N/A	N/A
Otu3343	Sordariomycetes (1.00)	Glomerellales (0.98)
Otu3344	N/A	N/A
Otu3347	N/A	N/A
Otu3349	N/A	N/A
Otu3351	N/A	N/A
Otu3353	N/A	N/A
Otu3354	Dothideomycetes (0.97)	Pleosporales (0.97)
Otu3355	Sordariomycetes (0.8)	N/A
Otu3358	Sordariomycetes (0.96)	Xylariales (0.91)
Otu3360	Eurotiomycetes (0.91)	N/A
Otu3361	N/A	N/A
Otu3362	N/A	N/A
Otu3364	N/A	N/A
Otu3365	Sordariomycetes (1.00)	Sordariales (1.00)
Otu3369	Sordariomycetes (0.97)	Xylariales (0.95)
Otu3370	N/A	N/A
Otu3373	Sordariomycetes (0.99)	N/A
Otu3374	Sordariomycetes (1.00)	Xylariales (0.98)
Otu3375	N/A	N/A
Otu3377	N/A	N/A
Otu3378	Sordariomycetes (0.81)	N/A
Otu3379	N/A	N/A
Otu3380	Sordariomycetes (0.99)	N/A
Otu3381	N/A	N/A
Otu3382	Sordariomycetes (0.98)	N/A
Otu3383	Sordariomycetes (1.00)	N/A
Otu3385	Leotiomycetes (0.99)	Helotiales (0.99)
Otu3386	Sordariomycetes (1.00)	Glomerellales (1.00)
Otu3389	N/A	N/A
Otu339	Sordariomycetes (1.00)	Xylariales (1.00)
Otu3390	Pezizomycetes (1.00)	Pezizales (1.00)
Otu3391	Dothideomycetes (0.96)	Pleosporales (0.95)
Otu3392	Sordariomycetes (0.89)	N/A
Otu3393	N/A	N/A
Otu3394	Sordariomycetes (0.89)	N/A
Otu3395	Sordariomycetes (0.84)	N/A
Otu3399	Leotiomycetes (1.00)	Helotiales (1.00)
Otu3400	N/A	N/A
Otu3401	Sordariomycetes (0.93)	N/A
Otu3402	Sordariomycetes (0.99)	Chaetosphaeriales (0.99)
Otu3404	Sordariomycetes (0.97)	Hypocreales (0.96)
Otu3405	Dothideomycetes (0.9)	Pleosporales (0.89)
Otu3408	Eurotiomycetes (1.00)	Chaetothyriales (1.00)
Otu3409	Dothideomycetes (0.99)	Capnodiales (0.99)
Otu341	N/A	N/A
Otu3412	Sordariomycetes (0.95)	Xylariales (0.94)
Otu3413	N/A	N/A
Otu3415	N/A	N/A
Otu3418	Sordariomycetes (0.85)	N/A
Otu3419	N/A	N/A
Otu342	Dothideomycetes (0.94)	Capnodiales (0.94)
Otu3420	Sordariomycetes (0.9)	N/A
Otu3421	Sordariomycetes (0.95)	N/A
Otu3422	Sordariomycetes (1.00)	Hypocreales (1.00)
Otu3423	Sordariomycetes (1.00)	Glomerellales (1.00)
Otu3425	Sordariomycetes (0.87)	N/A
Otu3427	N/A	N/A
Otu3428	Orbiliomycetes (0.97)	Orbiliales (0.97)
Otu3429	N/A	N/A
Otu343	Sordariomycetes (1.00)	Diaporthales (1.00)
Otu3433	Sordariomycetes (1.00)	Sordariales (1.00)
Otu3435	Dothideomycetes (0.96)	N/A
Otu3436	N/A	N/A
Otu3437	Sordariomycetes (0.92)	N/A
Otu3438	Sordariomycetes (0.99)	Xylariales (0.83)
Otu3439	Sordariomycetes (0.97)	Xylariales (0.8)
Otu344	Sordariomycetes (1.00)	N/A
Otu3440	Sordariomycetes (0.96)	N/A
Otu3441	Eurotiomycetes (0.85)	Chaetothyriales (0.81)
Otu3442	N/A	N/A
Otu3446	N/A	N/A
Otu3447	Sordariomycetes (0.92)	N/A
Otu3449	Sordariomycetes (1.00)	Xylariales (1.00)
Otu345	Leotiomycetes (0.87)	Helotiales (0.87)
Otu3452	Sordariomycetes (0.93)	N/A
Otu3453	Sordariomycetes (0.99)	N/A
Otu3454	N/A	N/A
Otu3455	Saccharomycetes (1.00)	Saccharomycetales (1.00)
Otu3456	Leotiomycetes (1.00)	Helotiales (1.00)
Otu3457	Sordariomycetes (1.00)	Sordariales (1.00)
Otu3459	Sordariomycetes (0.97)	N/A
Otu3460	N/A	N/A
Otu3461	N/A	N/A
Otu3464	Leotiomycetes (0.99)	Helotiales (0.99)
Otu3465	N/A	N/A
Otu3469	N/A	N/A
Otu3471	Sordariomycetes (0.95)	N/A
Otu3472	Dothideomycetes (1.00)	Botryosphaeriales (1.00)
Otu3473	N/A	N/A
Otu3474	Sordariomycetes (0.94)	Xylariales (0.92)
Otu3477	Sordariomycetes (1.00)	Xylariales (1.00)
Otu3478	Sordariomycetes (0.99)	Hypocreales (0.99)
Otu3479	Sordariomycetes (0.9)	Xylariales (0.89)
Otu3483	Leotiomycetes (0.91)	Helotiales (0.82)
Otu3486	N/A	N/A
Otu3488	Sordariomycetes (0.97)	Xylariales (0.97)
Otu3489	Sordariomycetes (0.85)	N/A
Otu3490	Sordariomycetes (0.86)	N/A
Otu3491	N/A	N/A
Otu3492	N/A	N/A
Otu3494	Leotiomycetes (0.8)	N/A
Otu3497	Sordariomycetes (0.81)	N/A
Otu3499	N/A	N/A
Otu35	Sordariomycetes (1.00)	Glomerellales (1.00)
Otu350	N/A	N/A
Otu3501	N/A	N/A
Otu3504	Orbiliomycetes (0.83)	N/A
Otu3505	Sordariomycetes (0.98)	Glomerellales (0.96)
Otu3506	Dothideomycetes (0.91)	N/A
Otu3507	Sordariomycetes (1.00)	Xylariales (0.98)
Otu3508	Sordariomycetes (0.96)	Hypocreales (0.96)
Otu351	N/A	N/A
Otu3513	Sordariomycetes (0.9)	Hypocreales (0.9)
Otu3515	Sordariomycetes (0.99)	Chaetosphaeriales (0.96)
Otu3517	Leotiomycetes (0.9)	Helotiales (0.9)
Otu3518	N/A	N/A
Otu3519	Sordariomycetes (0.96)	N/A
Otu352	N/A	N/A
Otu3520	Dothideomycetes (0.99)	N/A
Otu3532	Sordariomycetes (0.96)	Xylariales (0.95)
Otu3534	Sordariomycetes (1.00)	Xylariales (1.00)
Otu3536	Sordariomycetes (0.96)	N/A
Otu3537	Sordariomycetes (0.99)	N/A
Otu3538	N/A	N/A
Otu3539	Sordariomycetes (0.84)	N/A
Otu3540	N/A	N/A
Otu3543	Dothideomycetes (0.92)	Capnodiales (0.89)
Otu3544	Sordariomycetes (0.94)	N/A
Otu3545	Eurotiomycetes (0.97)	Chaetothyriales (0.97)
Otu3546	Sordariomycetes (0.94)	Sordariales (0.83)
Otu355	Sordariomycetes (0.89)	N/A
Otu3550	N/A	N/A
Otu3551	Orbiliomycetes (0.94)	N/A
Otu3554	N/A	N/A
Otu3555	Sordariomycetes (1.00)	Glomerellales (0.99)
Otu3556	Sordariomycetes (0.95)	N/A
Otu3558	Sordariomycetes (0.98)	Hypocreales (0.95)
Otu356	Sordariomycetes (0.93)	Hypocreales (0.93)
Otu3561	N/A	N/A
Otu3562	Sordariomycetes (0.96)	Xylariales (0.92)
Otu3565	N/A	N/A
Otu3567	Sordariomycetes (0.99)	Chaetosphaeriales (0.99)
Otu3568	Sordariomycetes (0.92)	Xylariales (0.92)
Otu357	Eurotiomycetes (1.00)	Chaetothyriales (1.00)
Otu3572	Sordariomycetes (0.86)	Glomerellales (0.86)
Otu3573	Sordariomycetes (0.94)	N/A
Otu3575	N/A	N/A
Otu3576	Leotiomycetes (0.8)	Helotiales (0.8)
Otu3577	Sordariomycetes (0.96)	N/A
Otu3579	Eurotiomycetes (1.00)	Chaetothyriales (1.00)
Otu3583	Sordariomycetes (0.93)	N/A
Otu3585	N/A	N/A
Otu3587	Sordariomycetes (0.89)	N/A
Otu3588	N/A	N/A
Otu3589	N/A	N/A
Otu359	Leotiomycetes (0.8)	Helotiales (0.8)
Otu3591	Sordariomycetes (0.91)	N/A
Otu3592	N/A	N/A
Otu3593	Sordariomycetes (0.99)	Glomerellales (0.98)
Otu3594	Pezizomycetes (1.00)	Pezizales (1.00)
Otu3598	Sordariomycetes (1.00)	Xylariales (1.00)
Otu36	Sordariomycetes (1.00)	N/A
Otu360	Dothideomycetes (1.00)	Venturiales (1.00)
Otu3604	Sordariomycetes (0.98)	Xylariales (0.98)
Otu3606	Sordariomycetes (0.93)	N/A
Otu3607	Sordariomycetes (0.98)	Xylariales (0.85)
Otu3608	Sordariomycetes (0.9)	N/A
Otu3609	Sordariomycetes (1.00)	Xylariales (1.00)
Otu361	Sordariomycetes (1.00)	Hypocreales (1.00)
Otu3610	N/A	N/A
Otu3615	Orbiliomycetes (0.99)	Orbiliales (0.99)
Otu3616	Sordariomycetes (1.00)	N/A
Otu3617	Sordariomycetes (0.99)	N/A
Otu3618	N/A	N/A
Otu3619	N/A	N/A
Otu3620	Sordariomycetes (0.89)	N/A
Otu3621	N/A	N/A
Otu3627	Dothideomycetes (1.00)	N/A
Otu3628	N/A	N/A
Otu3629	Sordariomycetes (0.91)	Diaporthales (0.91)
Otu3630	N/A	N/A
Otu3636	N/A	N/A
Otu3637	N/A	N/A
Otu3638	Eurotiomycetes (0.8)	N/A
Otu364	Lecanoromycetes (1.00)	Lecanorales (1.00)
Otu3641	Sordariomycetes (0.89)	N/A
Otu3642	Dothideomycetes (0.97)	Myriangiales (0.97)
Otu3645	Sordariomycetes (0.99)	Xylariales (0.94)
Otu3650	Sordariomycetes (0.96)	Xylariales (0.91)
Otu3652	Sordariomycetes (0.82)	N/A
Otu3655	Dothideomycetes (1.00)	Pleosporales (1.00)
Otu3659	Sordariomycetes (0.97)	Xylariales (0.9)
Otu366	Leotiomycetes (0.94)	Helotiales (0.93)
Otu3660	Sordariomycetes (0.92)	N/A
Otu3661	Sordariomycetes (0.97)	Hypocreales (0.97)
Otu3662	N/A	N/A
Otu3663	Leotiomycetes (0.96)	Helotiales (0.95)
Otu3665	N/A	N/A
Otu3667	Dothideomycetes (0.91)	Capnodiales (0.91)
Otu3669	Sordariomycetes (0.98)	Glomerellales (0.88)
Otu3673	N/A	N/A
Otu3674	Sordariomycetes (0.96)	N/A
Otu3675	N/A	N/A
Otu3676	Eurotiomycetes (1.00)	Chaetothyriales (1.00)
Otu3677	Sordariomycetes (0.9)	Xylariales (0.9)
Otu3679	Sordariomycetes (0.98)	Chaetosphaeriales (0.92)
Otu368	Eurotiomycetes (0.93)	N/A
Otu3680	Dothideomycetes (0.94)	Venturiales (0.94)
Otu3681	Sordariomycetes (1.00)	Hypocreales (0.99)
Otu3682	N/A	N/A
Otu3683	Sordariomycetes (0.92)	N/A
Otu3684	Eurotiomycetes (0.96)	Chaetothyriales (0.96)
Otu3685	Sordariomycetes (0.87)	N/A
Otu3686	Sordariomycetes (0.95)	N/A
Otu3687	N/A	N/A
Otu3689	Leotiomycetes (1.00)	Helotiales (1.00)
Otu369	Eurotiomycetes (1.00)	Chaetothyriales (1.00)
Otu3691	Pezizomycetes (0.86)	Pezizales (0.86)
Otu3694	N/A	N/A
Otu3695	Sordariomycetes (0.94)	Hypocreales (0.94)
Otu3698	N/A	N/A
Otu3699	Sordariomycetes (0.94)	N/A
Otu37	Eurotiomycetes (0.97)	Chaetothyriales (0.97)
Otu3700	Sordariomycetes (0.99)	Xylariales (0.99)
Otu3701	N/A	N/A
Otu3702	N/A	N/A
Otu3703	Eurotiomycetes (1.00)	Chaetothyriales (1.00)
Otu3704	N/A	N/A
Otu3705	Sordariomycetes (0.93)	N/A
Otu3706	Sordariomycetes (1.00)	Xylariales (1.00)
Otu3707	Saccharomycetes (0.98)	Saccharomycetales (0.98)
Otu371	Dothideomycetes (0.96)	Capnodiales (0.96)
Otu3710	Eurotiomycetes (0.9)	Chaetothyriales (0.88)
Otu3711	Dothideomycetes (0.9)	Pleosporales (0.86)
Otu3712	Dothideomycetes (0.97)	Botryosphaeriales (0.95)
Otu3713	Dothideomycetes (0.97)	Botryosphaeriales (0.97)
Otu3717	Orbiliomycetes (0.98)	Orbiliales (0.98)
Otu3719	Dothideomycetes (0.99)	Capnodiales (0.99)
Otu3720	Leotiomycetes (1.00)	Helotiales (1.00)
Otu3721	Sordariomycetes (0.99)	Chaetosphaeriales (0.87)
Otu3726	Sordariomycetes (0.96)	N/A
Otu3727	N/A	N/A
Otu373	N/A	N/A
Otu3730	Leotiomycetes (1.00)	Rhytismatales (1.00)
Otu3731	Dothideomycetes (1.00)	Myriangiales (1.00)
Otu3732	N/A	N/A
Otu3733	Sordariomycetes (0.97)	Xylariales (0.96)
Otu3735	Eurotiomycetes (0.8)	N/A
Otu3736	N/A	N/A
Otu3738	N/A	N/A
Otu3739	Sordariomycetes (1.00)	Xylariales (0.99)
Otu3742	Sordariomycetes (1.00)	N/A
Otu3745	Pezizomycetes (1.00)	Pezizales (1.00)
Otu3746	N/A	N/A
Otu3749	Sordariomycetes (0.9)	N/A
Otu375	Sordariomycetes (1.00)	Xylariales (1.00)
Otu3752	N/A	N/A
Otu3757	Eurotiomycetes (0.9)	Eurotiales (0.9)
Otu3758	Leotiomycetes (0.83)	N/A
Otu3761	N/A	N/A
Otu3766	N/A	N/A
Otu3767	Leotiomycetes (1.00)	Helotiales (1.00)
Otu3769	Dothideomycetes (0.83)	Pleosporales (0.83)
Otu3770	Sordariomycetes (1.00)	Togniniales (0.9)
Otu3771	Sordariomycetes (0.95)	N/A
Otu3772	Sordariomycetes (0.91)	Xylariales (0.85)
Otu3773	Leotiomycetes (1.00)	Helotiales (1.00)
Otu3774	Sordariomycetes (0.99)	N/A
Otu3775	Sordariomycetes (0.93)	N/A
Otu3776	Sordariomycetes (0.96)	N/A
Otu3779	Leotiomycetes (1.00)	Helotiales (1.00)
Otu378	Sordariomycetes (0.97)	Xylariales (0.89)
Otu3782	N/A	N/A
Otu3783	Sordariomycetes (0.85)	N/A
Otu3784	Sordariomycetes (0.84)	N/A
Otu3787	Sordariomycetes (1.00)	Xylariales (0.99)
Otu3788	Sordariomycetes (0.87)	N/A
Otu3789	Dothideomycetes (0.97)	Pleosporales (0.97)
Otu3790	Dothideomycetes (1.00)	Capnodiales (1.00)
Otu3791	N/A	N/A
Otu3792	Sordariomycetes (0.97)	Xylariales (0.93)
Otu3794	N/A	N/A
Otu3795	Sordariomycetes (0.9)	Xylariales (0.85)
Otu3796	N/A	N/A
Otu3797	Pezizomycetes (1.00)	Pezizales (1.00)
Otu3798	Saccharomycetes (1.00)	Saccharomycetales (1.00)
Otu38	Sordariomycetes (0.93)	N/A
Otu3801	N/A	N/A
Otu3803	Sordariomycetes (0.97)	N/A
Otu3806	N/A	N/A
Otu3808	Sordariomycetes (0.82)	N/A
Otu3809	N/A	N/A
Otu381	N/A	N/A
Otu3810	Dothideomycetes (0.83)	Capnodiales (0.82)
Otu3811	Leotiomycetes (0.98)	Helotiales (0.98)
Otu3814	Sordariomycetes (0.92)	Xylariales (0.84)
Otu3815	Sordariomycetes (1.00)	Glomerellales (0.99)
Otu3816	N/A	N/A
Otu3817	Dothideomycetes (1.00)	Capnodiales (1.00)
Otu3818	Sordariomycetes (0.82)	N/A
Otu3819	Sordariomycetes (0.85)	N/A
Otu382	Sordariomycetes (0.93)	N/A
Otu3821	Sordariomycetes (1.00)	Hypocreales (1.00)
Otu3823	Sordariomycetes (1.00)	N/A
Otu3824	N/A	N/A
Otu3825	Sordariomycetes (0.97)	Xylariales (0.97)
Otu3826	Leotiomycetes (0.83)	Helotiales (0.82)
Otu3827	Sordariomycetes (1.00)	Hypocreales (1.00)
Otu3828	Eurotiomycetes (0.87)	Chaetothyriales (0.85)
Otu383	Sordariomycetes (0.91)	N/A
Otu3830	Sordariomycetes (1.00)	Diaporthales (1.00)
Otu3831	Lecanoromycetes (0.82)	N/A
Otu3833	N/A	N/A
Otu3834	Sordariomycetes (0.95)	Xylariales (0.94)
Otu3837	N/A	N/A
Otu3838	Sordariomycetes (0.99)	Xylariales (0.98)
Otu3839	Sordariomycetes (0.99)	N/A
Otu384	Sordariomycetes (0.96)	Xylariales (0.95)
Otu3840	Leotiomycetes (0.88)	Helotiales (0.88)
Otu3842	Sordariomycetes (0.95)	N/A
Otu3845	Sordariomycetes (0.99)	Xylariales (0.99)
Otu3847	N/A	N/A
Otu3848	Sordariomycetes (0.92)	N/A
Otu3849	Sordariomycetes (0.98)	N/A
Otu385	Sordariomycetes (0.84)	N/A
Otu3850	Sordariomycetes (1.00)	Diaporthales (1.00)
Otu3851	Dothideomycetes (1.00)	Pleosporales (1.00)
Otu3852	Dothideomycetes (1.00)	Pleosporales (1.00)
Otu3854	Dothideomycetes (0.95)	Pleosporales (0.95)
Otu3855	Sordariomycetes (0.94)	N/A
Otu3856	Dothideomycetes (1.00)	Pleosporales (1.00)
Otu3859	Sordariomycetes (0.99)	N/A
Otu386	Sordariomycetes (0.89)	N/A
Otu3860	Sordariomycetes (0.82)	N/A
Otu3862	N/A	N/A
Otu3866	Dothideomycetes (0.87)	Capnodiales (0.86)
Otu3867	Sordariomycetes (1.00)	Xylariales (1.00)
Otu3868	Sordariomycetes (0.85)	Xylariales (0.83)
Otu3870	Sordariomycetes (0.99)	Xylariales (0.99)
Otu3871	Sordariomycetes (0.99)	Hypocreales (0.99)
Otu3872	Leotiomycetes (0.99)	Helotiales (0.99)
Otu3875	Dothideomycetes (0.98)	Pleosporales (0.98)
Otu3876	N/A	N/A
Otu3877	N/A	N/A
Otu3878	Sordariomycetes (0.82)	N/A
Otu3879	N/A	N/A
Otu388	Sordariomycetes (1.00)	Boliniales (1.00)
Otu3880	Sordariomycetes (0.95)	N/A
Otu3881	Sordariomycetes (0.89)	Xylariales (0.84)
Otu3882	N/A	N/A
Otu3884	Sordariomycetes (0.98)	Xylariales (0.95)
Otu3885	Eurotiomycetes (1.00)	Chaetothyriales (1.00)
Otu3886	N/A	N/A
Otu3887	Dothideomycetes (0.91)	N/A
Otu3888	Sordariomycetes (0.82)	N/A
Otu3889	Sordariomycetes (1.00)	Xylariales (1.00)
Otu389	N/A	N/A
Otu3892	N/A	N/A
Otu3893	Sordariomycetes (0.84)	N/A
Otu3895	Sordariomycetes (0.95)	Xylariales (0.84)
Otu3896	N/A	N/A
Otu3897	Sordariomycetes (0.84)	N/A
Otu3899	Sordariomycetes (1.00)	N/A
Otu39	Eurotiomycetes (0.87)	N/A
Otu390	N/A	N/A
Otu3900	Sordariomycetes (1.00)	Hypocreales (1.00)
Otu3902	N/A	N/A
Otu3903	N/A	N/A
Otu3904	Sordariomycetes (0.85)	Xylariales (0.8)
Otu3905	N/A	N/A
Otu3906	Pezizomycetes (1.00)	Pezizales (1.00)
Otu3908	Sordariomycetes (0.84)	Hypocreales (0.84)
Otu391	Sordariomycetes (1.00)	Glomerellales (1.00)
Otu3910	Sordariomycetes (0.93)	Hypocreales (0.92)
Otu3911	Sordariomycetes (1.00)	Xylariales (1.00)
Otu3912	Sordariomycetes (0.96)	Xylariales (0.88)
Otu3915	Sordariomycetes (0.84)	Hypocreales (0.8)
Otu3916	N/A	N/A
Otu3917	Sordariomycetes (1.00)	Xylariales (1.00)
Otu3919	Eurotiomycetes (0.99)	Chaetothyriales (0.99)
Otu3920	Sordariomycetes (0.96)	N/A
Otu3921	Sordariomycetes (0.97)	Diaporthales (0.97)
Otu3922	N/A	N/A
Otu3923	Leotiomycetes (0.94)	Helotiales (0.93)
Otu3924	N/A	N/A
Otu3925	Sordariomycetes (0.99)	N/A
Otu3928	N/A	N/A
Otu3929	N/A	N/A
Otu393	Dothideomycetes (0.85)	Capnodiales (0.83)
Otu3930	Leotiomycetes (0.99)	Helotiales (0.98)
Otu3934	N/A	N/A
Otu3937	Eurotiomycetes (0.98)	Chaetothyriales (0.97)
Otu3938	Sordariomycetes (1.00)	Xylariales (0.95)
Otu3939	N/A	N/A
Otu394	Sordariomycetes (0.96)	N/A
Otu3940	N/A	N/A
Otu3943	Sordariomycetes (1.00)	Microascales (0.89)
Otu3945	Sordariomycetes (1.00)	Magnaporthales (1.00)
Otu3946	N/A	N/A
Otu3947	Sordariomycetes (0.95)	Diaporthales (0.95)
Otu3948	N/A	N/A
Otu3949	N/A	N/A
Otu3952	N/A	N/A
Otu3953	Sordariomycetes (0.98)	Xylariales (0.86)
Otu3954	Orbiliomycetes (0.99)	Orbiliales (0.99)
Otu3957	Sordariomycetes (0.83)	N/A
Otu3958	N/A	N/A
Otu3959	Saccharomycetes (0.97)	Saccharomycetales (0.97)
Otu396	Sordariomycetes (1.00)	Xylariales (1.00)
Otu3960	N/A	N/A
Otu3961	Sordariomycetes (0.83)	N/A
Otu3962	Sordariomycetes (0.82)	N/A
Otu3963	Sordariomycetes (0.99)	Hypocreales (0.99)
Otu3964	Orbiliomycetes (0.99)	Orbiliales (0.99)
Otu3966	Leotiomycetes (0.94)	Helotiales (0.94)
Otu3969	N/A	N/A
Otu397	Eurotiomycetes (0.96)	Chaetothyriales (0.96)
Otu3970	Sordariomycetes (0.92)	Xylariales (0.82)
Otu3971	N/A	N/A
Otu3972	Sordariomycetes (0.86)	N/A
Otu3974	Sordariomycetes (0.98)	Sordariales (0.95)
Otu3975	N/A	N/A
Otu3976	Eurotiomycetes (0.89)	Chaetothyriales (0.86)
Otu3978	Sordariomycetes (0.89)	N/A
Otu3979	N/A	N/A
Otu3981	Dothideomycetes (0.95)	N/A
Otu3982	Sordariomycetes (0.96)	Xylariales (0.95)
Otu3984	Sordariomycetes (1.00)	Xylariales (1.00)
Otu3985	Sordariomycetes (0.8)	N/A
Otu3986	Sordariomycetes (0.99)	N/A
Otu3988	Sordariomycetes (0.97)	N/A
Otu3989	Sordariomycetes (0.81)	N/A
Otu399	Sordariomycetes (0.99)	Hypocreales (0.99)
Otu3990	Sordariomycetes (0.81)	N/A
Otu3993	Sordariomycetes (0.94)	Xylariales (0.94)
Otu3994	Dothideomycetes (0.94)	N/A
Otu3995	Sordariomycetes (0.96)	Xylariales (0.91)
Otu3996	N/A	N/A
Otu3999	N/A	N/A
Otu4	Sordariomycetes (1.00)	Diaporthales (1.00)
Otu40	N/A	N/A
Otu400	Dothideomycetes (1.00)	Hysteriales (0.98)
Otu4001	N/A	N/A
Otu4003	Saccharomycetes (0.97)	Saccharomycetales (0.97)
Otu4006	Eurotiomycetes (0.82)	Chaetothyriales (0.81)
Otu4007	N/A	N/A
Otu4009	Eurotiomycetes (0.98)	Chaetothyriales (0.98)
Otu401	N/A	N/A
Otu4015	Sordariomycetes (0.99)	Xylariales (0.99)
Otu4016	Orbiliomycetes (0.84)	N/A
Otu4017	Dothideomycetes (0.96)	Pleosporales (0.96)
Otu4018	Sordariomycetes (0.87)	N/A
Otu402	Sordariomycetes (0.99)	Xylariales (0.99)
Otu4020	Sordariomycetes (0.97)	N/A
Otu4022	Leotiomycetes (0.81)	Helotiales (0.81)
Otu4025	N/A	N/A
Otu4028	N/A	N/A
Otu403	Dothideomycetes (0.85)	Pleosporales (0.85)
Otu4030	Orbiliomycetes (0.82)	Orbiliales (0.82)
Otu4031	N/A	N/A
Otu4032	Leotiomycetes (0.99)	Helotiales (0.97)
Otu4033	Sordariomycetes (1.00)	Xylariales (1.00)
Otu4034	Sordariomycetes (0.99)	Hypocreales (0.98)
Otu4035	Sordariomycetes (0.99)	Xylariales (0.97)
Otu4036	Eurotiomycetes (0.93)	Chaetothyriales (0.93)
Otu4039	Sordariomycetes (0.99)	Xylariales (0.95)
Otu404	Sordariomycetes (1.00)	Sordariales (1.00)
Otu4040	Sordariomycetes (1.00)	Xylariales (0.95)
Otu4042	Sordariomycetes (0.81)	N/A
Otu4043	Sordariomycetes (1.00)	Diaporthales (1.00)
Otu4044	N/A	N/A
Otu4045	Eurotiomycetes (0.99)	Chaetothyriales (0.99)
Otu4046	Sordariomycetes (0.99)	Xylariales (0.99)
Otu4047	N/A	N/A
Otu4048	Eurotiomycetes (1.00)	Chaetothyriales (1.00)
Otu4050	Leotiomycetes (0.99)	Helotiales (0.99)
Otu4052	N/A	N/A
Otu4053	Sordariomycetes (0.97)	N/A
Otu4054	N/A	N/A
Otu4056	Sordariomycetes (0.87)	N/A
Otu4057	Sordariomycetes (0.94)	Xylariales (0.94)
Otu4058	Dothideomycetes (0.93)	N/A
Otu4059	Sordariomycetes (0.97)	Hypocreales (0.94)
Otu406	N/A	N/A
Otu4060	N/A	N/A
Otu4062	Dothideomycetes (0.82)	Capnodiales (0.8)
Otu4064	Sordariomycetes (1.00)	Xylariales (1.00)
Otu4066	N/A	N/A
Otu4068	Sordariomycetes (0.89)	N/A
Otu4069	Eurotiomycetes (0.89)	N/A
Otu4070	N/A	N/A
Otu4077	Sordariomycetes (1.00)	Glomerellales (0.99)
Otu4078	Sordariomycetes (1.00)	Microascales (0.82)
Otu4083	N/A	N/A
Otu4084	N/A	N/A
Otu4085	Sordariomycetes (1.00)	N/A
Otu4088	Dothideomycetes (0.85)	Pleosporales (0.85)
Otu409	Sordariomycetes (0.81)	N/A
Otu4090	Sordariomycetes (1.00)	Xylariales (1.00)
Otu4091	N/A	N/A
Otu4092	Sordariomycetes (0.91)	N/A
Otu4094	Sordariomycetes (0.91)	N/A
Otu4096	Sordariomycetes (0.96)	Hypocreales (0.93)
Otu4098	N/A	N/A
Otu4099	Sordariomycetes (0.9)	N/A
Otu41	Sordariomycetes (1.00)	N/A
Otu410	N/A	N/A
Otu4101	Dothideomycetes (1.00)	Capnodiales (1.00)
Otu4102	Sordariomycetes (0.82)	N/A
Otu4103	Sordariomycetes (0.83)	N/A
Otu4104	Leotiomycetes (0.93)	Helotiales (0.93)
Otu4105	Sordariomycetes (0.94)	Xylariales (0.93)
Otu4107	Sordariomycetes (0.86)	N/A
Otu411	Eurotiomycetes (1.00)	Chaetothyriales (1.00)
Otu4110	N/A	N/A
Otu4111	Sordariomycetes (0.99)	Chaetosphaeriales (0.99)
Otu4112	Sordariomycetes (0.91)	Xylariales (0.86)
Otu4113	N/A	N/A
Otu4115	N/A	N/A
Otu4116	Sordariomycetes (0.98)	Microascales (0.9)
Otu4118	N/A	N/A
Otu4119	Sordariomycetes (0.91)	Xylariales (0.82)
Otu412	Sordariomycetes (0.97)	Xylariales (0.97)
Otu4121	Sordariomycetes (1.00)	Hypocreales (1.00)
Otu4122	Leotiomycetes (1.00)	Helotiales (0.92)
Otu4123	N/A	N/A
Otu4124	Eurotiomycetes (0.94)	Chaetothyriales (0.88)
Otu4128	N/A	N/A
Otu4129	Dothideomycetes (0.81)	Capnodiales (0.81)
Otu413	N/A	N/A
Otu4130	Eurotiomycetes (0.9)	Chaetothyriales (0.85)
Otu4138	Sordariomycetes (0.97)	Xylariales (0.91)
Otu4140	Sordariomycetes (0.82)	N/A
Otu4144	Dothideomycetes (0.83)	N/A
Otu4148	Sordariomycetes (0.99)	Xylariales (0.97)
Otu4149	Saccharomycetes (1.00)	Saccharomycetales (1.00)
Otu415	Dothideomycetes (0.97)	Pleosporales (0.97)
Otu4150	N/A	N/A
Otu4151	N/A	N/A
Otu4152	Sordariomycetes (1.00)	Xylariales (1.00)
Otu4153	Sordariomycetes (0.87)	N/A
Otu4154	Sordariomycetes (0.81)	N/A
Otu4157	Sordariomycetes (0.81)	N/A
Otu4158	Dothideomycetes (0.84)	Capnodiales (0.83)
Otu416	Sordariomycetes (0.94)	N/A
Otu4160	N/A	N/A
Otu4161	Sordariomycetes (0.89)	N/A
Otu4162	N/A	N/A
Otu4163	N/A	N/A
Otu4164	Sordariomycetes (0.97)	N/A
Otu4167	Dothideomycetes (0.88)	Pleosporales (0.88)
Otu4168	Leotiomycetes (0.8)	Helotiales (0.8)
Otu4169	N/A	N/A
Otu417	Sordariomycetes (0.95)	N/A
Otu4171	Sordariomycetes (1.00)	Hypocreales (0.99)
Otu4172	Sordariomycetes (0.92)	Xylariales (0.83)
Otu4175	Sordariomycetes (0.98)	Hypocreales (0.98)
Otu4178	Leotiomycetes (0.99)	Helotiales (0.89)
Otu4179	Sordariomycetes (0.94)	Xylariales (0.81)
Otu418	Leotiomycetes (0.8)	N/A
Otu4180	Sordariomycetes (0.82)	N/A
Otu4182	Sordariomycetes (0.99)	Xylariales (0.98)
Otu4183	Leotiomycetes (0.96)	Helotiales (0.95)
Otu4189	N/A	N/A
Otu419	Sordariomycetes (0.98)	Xylariales (0.85)
Otu4190	Dothideomycetes (0.91)	Capnodiales (0.91)
Otu4192	Eurotiomycetes (0.83)	Eurotiales (0.83)
Otu4193	Sordariomycetes (0.9)	N/A
Otu4194	Sordariomycetes (0.9)	N/A
Otu4197	Sordariomycetes (0.95)	Xylariales (0.94)
Otu4198	N/A	N/A
Otu4199	Sordariomycetes (0.9)	Xylariales (0.88)
Otu42	Dothideomycetes (0.99)	Capnodiales (0.99)
Otu420	Dothideomycetes (1.00)	Pleosporales (1.00)
Otu4200	Eurotiomycetes (0.88)	Chaetothyriales (0.86)
Otu4201	Sordariomycetes (0.81)	N/A
Otu4210	Sordariomycetes (1.00)	N/A
Otu4211	Sordariomycetes (1.00)	Glomerellales (1.00)
Otu4212	Saccharomycetes (1.00)	Saccharomycetales (1.00)
Otu4214	N/A	N/A
Otu4215	Sordariomycetes (0.95)	N/A
Otu4217	Sordariomycetes (0.84)	N/A
Otu4218	Eurotiomycetes (0.82)	Chaetothyriales (0.82)
Otu4219	Dothideomycetes (0.95)	Acrospermales (0.95)
Otu422	Dothideomycetes (0.97)	N/A
Otu4220	N/A	N/A
Otu4222	N/A	N/A
Otu4223	Dothideomycetes (1.00)	Venturiales (1.00)
Otu4224	N/A	N/A
Otu4225	Sordariomycetes (1.00)	Hypocreales (1.00)
Otu4226	N/A	N/A
Otu423	N/A	N/A
Otu4230	Eurotiomycetes (0.83)	N/A
Otu4231	N/A	N/A
Otu4235	Sordariomycetes (0.98)	Chaetosphaeriales (0.97)
Otu4240	N/A	N/A
Otu4241	Sordariomycetes (0.92)	N/A
Otu4242	Sordariomycetes (0.94)	Xylariales (0.94)
Otu4244	Sordariomycetes (0.97)	N/A
Otu4248	Dothideomycetes (0.92)	Capnodiales (0.88)
Otu4249	Eurotiomycetes (0.89)	Chaetothyriales (0.8)
Otu4252	N/A	N/A
Otu4257	N/A	N/A
Otu4258	Sordariomycetes (0.94)	Xylariales (0.9)
Otu4259	Dothideomycetes (0.88)	Capnodiales (0.87)
Otu426	Sordariomycetes (0.94)	Xylariales (0.89)
Otu4260	Dothideomycetes (0.95)	Pleosporales (0.95)
Otu4261	N/A	N/A
Otu4262	Leotiomycetes (0.94)	Helotiales (0.94)
Otu4265	Dothideomycetes (0.96)	Capnodiales (0.96)
Otu4268	Orbiliomycetes (0.99)	Orbiliales (0.99)
Otu4269	Sordariomycetes (0.8)	N/A
Otu4270	N/A	N/A
Otu4271	Dothideomycetes (0.99)	Pleosporales (0.99)
Otu4272	Sordariomycetes (1.00)	Xylariales (1.00)
Otu4275	Sordariomycetes (0.92)	N/A
Otu4276	N/A	N/A
Otu4279	Leotiomycetes (0.97)	Helotiales (0.97)
Otu428	Sordariomycetes (0.92)	N/A
Otu4280	Leotiomycetes (0.98)	Helotiales (0.98)
Otu4281	N/A	N/A
Otu4282	Sordariomycetes (0.99)	Xylariales (0.82)
Otu4284	Sordariomycetes (0.86)	Xylariales (0.82)
Otu4287	Sordariomycetes (0.9)	Xylariales (0.81)
Otu4288	N/A	N/A
Otu429	Dothideomycetes (0.99)	N/A
Otu4290	Sordariomycetes (0.89)	N/A
Otu4291	Sordariomycetes (0.91)	N/A
Otu4294	Eurotiomycetes (1.00)	Chaetothyriales (0.99)
Otu4295	Dothideomycetes (1.00)	Myriangiales (1.00)
Otu4296	Eurotiomycetes (1.00)	Chaetothyriales (1.00)
Otu4299	N/A	N/A
Otu43	Dothideomycetes (1.00)	N/A
Otu4301	Sordariomycetes (1.00)	N/A
Otu4302	Dothideomycetes (0.85)	N/A
Otu4303	Sordariomycetes (0.96)	N/A
Otu4306	Sordariomycetes (0.96)	Glomerellales (0.82)
Otu4308	Sordariomycetes (0.87)	N/A
Otu4309	Sordariomycetes (0.82)	N/A
Otu431	Dothideomycetes (0.99)	Pleosporales (0.99)
Otu4311	Eurotiomycetes (0.9)	N/A
Otu4312	Dothideomycetes (1.00)	Pleosporales (1.00)
Otu4313	Orbiliomycetes (0.8)	Orbiliales (0.8)
Otu4314	Eurotiomycetes (0.98)	Chaetothyriales (0.98)
Otu4318	Eurotiomycetes (0.97)	Chaetothyriales (0.97)
Otu4319	Sordariomycetes (0.84)	N/A
Otu432	Sordariomycetes (1.00)	N/A
Otu4320	Sordariomycetes (1.00)	Hypocreales (1.00)
Otu4321	N/A	N/A
Otu4326	Sordariomycetes (0.88)	N/A
Otu4329	N/A	N/A
Otu433	Sordariomycetes (0.83)	N/A
Otu4330	Leotiomycetes (1.00)	Helotiales (1.00)
Otu4331	Sordariomycetes (0.98)	N/A
Otu4332	Sordariomycetes (0.94)	N/A
Otu4333	Saccharomycetes (0.98)	Saccharomycetales (0.98)
Otu4337	Sordariomycetes (0.99)	N/A
Otu434	N/A	N/A
Otu4340	Sordariomycetes (1.00)	Sordariales (0.98)
Otu4341	N/A	N/A
Otu4342	N/A	N/A
Otu4345	Sordariomycetes (0.96)	N/A
Otu4346	Eurotiomycetes (0.85)	N/A
Otu4347	N/A	N/A
Otu4348	N/A	N/A
Otu4349	Orbiliomycetes (1.00)	Orbiliales (1.00)
Otu435	Sordariomycetes (0.96)	Hypocreales (0.91)
[truncated: 741 more rows]
