# Supplementary material for: Climate and seasonality drive the richness and composition of tropical fungal endophytes at a landscape scale
Source: Commun Biol. 2021 Mar 9;4:313. doi: 10.1038/s42003-021-01826-7 (PMC7943826; doi:10.1038/s42003-021-01826-7)
Supplement: Supplementary file 6 — Supplementary Data 4 [file 42003_2021_1826_MOESM6_ESM.xlsx]

## Sheet: Data S4
Supplementary Data 4. Ascomycota included in the mock communities (tiered, even), with DNA concentration and expected and observed read numbers.
Isolate	Source	Phylum	Subphylum	Class	Order	Family	Genus	Species	Concentration in tiered community (ng/ul)	Concentration in even community (ng/ul)	Expected read number in tiered community	Expected read number in even community	Observed read number in tiered community	Observed read number in even community
CBS 352	Westerdijk Fungal Biodiversity Institute	Ascomycota	Taphrinomycotina	Schizosaccharomycetes	Schizosaccharomycetales	Schizosaccharomycetaceae	Schizosaccharomyces	Schizosaccharomyces pombe	5.68	1.84	1101.83	1219.78	98	760
CBS 7744	Westerdijk Fungal Biodiversity Institute	Ascomycota	Saccharomycotina	Saccharomycetes	Saccharomycetales	Metschnikowiaceae	Metschnikowia	Metschnikowia agaves	10.6	1.84	2056.24	1219.78	5046	4066
CBS 158.61	Westerdijk Fungal Biodiversity Institute	Ascomycota	Pezizomycotina	Sordariomycetes	Hypocreales	To be determined	Acremonium	Acremonium kiliense	10.2	1.84	1978.64	1219.78	9599	16738
CBS 124948	Westerdijk Fungal Biodiversity Institute	Ascomycota	Pezizomycotina	Sordariomycetes	Glomerellales	Glomerellaceae	Colletotrichum	Colletotrichum tropicale	2.53	1.84	490.781	1219.78	575	64
CBS 121445	Westerdijk Fungal Biodiversity Institute	Ascomycota	Pezizomycotina	Sordariomycetes	Sordariales	Coniochaetaceae	Coniochaeta	Coniochaeta prunicola	10.4	1.84	2017.44	1219.78	695	1841
CBS 161.73	Westerdijk Fungal Biodiversity Institute	Ascomycota	Pezizomycotina	Dothideomycetes	Pleosporales	Pleosporaceae	Epicoccum	Epicoccum nigrum	1.84	1.84	356.932	1219.78	1172	356
CBS 130337	Westerdijk Fungal Biodiversity Institute	Ascomycota	Pezizomycotina	Sordariomycetes	Hypocreales	Nectriaceae	Fusarium	Fusarium torulosum	2.98	1.84	578.075	1219.78	1771	1051
CBS 385.35	Westerdijk Fungal Biodiversity Institute	Ascomycota	Pezizomycotina	Sordariomycetes	Xylariales	Xylariaceae	Xylaria	Xylaria mali	5.16	1.84	1000.96	1219.78	2	2
CBS 100462	Westerdijk Fungal Biodiversity Institute	Ascomycota	Pezizomycotina	Dothideomycetes	Capnodiales	Cladosporiaceae	Cladosporium	Cladosporium sphaerospermum	3.08	1.84	597.473	1219.78	266	200
CBS 197.82	Westerdijk Fungal Biodiversity Institute	Ascomycota	Pezizomycotina	Dothideomycetes	Pleosporales	Didymosphaeriaceae	Dendrothyrium	Dendrothyrium variisporum	10.4	1.84	2017.44	1219.78	217	248
CBS 130859	Westerdijk Fungal Biodiversity Institute	Ascomycota	Pezizomycotina	Sordariomycetes	Hypocreales	Hypocreaceae	Hypocrea	Hypocrea orientalis	5.44	1.84	1055.28	1219.78	156	291
CBS 110123	Westerdijk Fungal Biodiversity Institute	Ascomycota	To be determined	To be determined	To be determined	To be determined	Lecanicillium	Lecanicillium muscarium	23.2	1.84	4500.45	1219.78	128	592
CBS 122753	Westerdijk Fungal Biodiversity Institute	Ascomycota	Pezizomycotina	Eurotiomycetes	Phaeomoniellales	To be determined	Neophaeomoniella	Neophaeomoniella zymoides	6.08	1.84	1179.43	1219.78	167	170
CBS 186.71	Westerdijk Fungal Biodiversity Institute	Ascomycota	Pezizomycotina	Sordariomycetes	Amphisphaeriales	Pestalotiopsidaceae	Pestalotiopsis	Pestalotiopsis chamaeropis	6.48	1.84	1257.02	1219.78	123	313
Peachpath1	Pathogen, UA-ARIZ	Ascomycota	Pezizomycotina	Dothideomycetes	Pleosporales	To be determined	Phoma	Phoma sp. A cf. aliena	2.58	1.84	500.481	1219.78	517	307
CBS 116499	Westerdijk Fungal Biodiversity Institute	Ascomycota	Pezizomycotina	Sordariomycetes	Amphisphaeriales	Discosiaceae	Seimatosporium	Seimatosporium lonicerae	11.8	1.84	2289.02	1219.78	1087	2068
CBS 119120	Westerdijk Fungal Biodiversity Institute	Ascomycota	Pezizomycotina	Sordariomycetes	Hypocreales	Hypocreaceae	Trichoderma	Trichoderma theobromicola	2.1	1.84	407.368	1219.78	9	4
CBS 388.52	Westerdijk Fungal Biodiversity Institute	Ascomycota	Pezizomycotina	Leotiomycetes	Helotiales	Sclerotiniaceae	Botryotinia	Botryotinia globosa	5.4	1.84	1047.52	1219.78	982	1133
AZ0245	Endophyte, UA-ARIZ	Ascomycota	Pezizomycotina	Pezizomycetes	To be determined	To be determined	To be determined	To be determined	13	1.84	2521.8	1219.78	Not detected	Not detected
